# Supplementary material for: Low mutational load and high mutation rate variation in gut commensal bacteria
Source: PLoS Biol. 2020 Mar 10;18(3):e3000617. doi: 10.1371/journal.pbio.3000617 (PMC7064181; doi:10.1371/journal.pbio.3000617)
Supplement: S5 Table — (XLSX) [file pbio.3000617.s023.xlsx]

## Sheet: S7_Table
S5 Table - Simulations with a monoclonal population of 10^6 individuals, accumulating deleterious and beneficial mutations with exponentially distributed effects (data for Figure 3B and S9 Figure). carryingCapacity - population size; generations - generations at which the population was sampled; mutationRate - mutation rate per genome per generation; fBen - fraction of beneficial mutations; s_d -…
carryingCapacity	generations	mutationRate	fBen	s_d	s_b	fitness_mean	fitness_sd	mutations_mean	mutations_sd	mutations_min	mutations_max	nrep	sb_rel	mutations_fit
1000000	1000	0.001	0	1e-05	0	0.99999	0	0.971715	0.0205123	0.954191	0.994277	3	sb = 0
1000000	1000	0.001	0	0.0001	0	0.999912	3.60555e-06	0.945104	0.0211151	0.922615	0.964505	3	sb = 0
1000000	1000	0.001	0	0.001	0	0.999512	2.40069e-05	0.687847	0.0130622	0.678538	0.702779	3	sb = 0
1000000	1000	0.001	0	0.01	0	0.999128	2.25906e-05	0.230772	0.00423969	0.226687	0.235151	3	sb = 0
1000000	1000	0.001	0.01	1e-05	0.01	1.19015	0.0949581	4.00111	0.593198	3.32845	4.44939	3	sb = 0.01
1000000	1000	0.001	0.01	1e-05	0.05	41.6184	21.4581	16.7758	1.46206	15.1789	18.0487	3	sb = 0.05
1000000	1000	0.001	0.01	0.0001	0.01	1.21263	0.101746	4.99584	0.615128	4.47453	5.6743	3	sb = 0.01
1000000	1000	0.001	0.01	0.0001	0.05	39.846	8.1063	16.9749	0.78145	16.1659	17.7256	3	sb = 0.05
1000000	1000	0.001	0.01	0.001	0.01	1.20135	0.0350379	4.09987	0.42574	3.60949	4.37505	3	sb = 0.01
1000000	1000	0.001	0.01	0.001	0.05	38.6396	11.0047	17.5489	2.27275	15.9463	20.1499	3	sb = 0.05
1000000	1000	0.001	0.01	0.01	0.01	1.18447	0.0353635	3.51197	0.420781	3.20153	3.99089	3	sb = 0.01
1000000	1000	0.001	0.01	0.01	0.05	32.5026	6.61192	15.1717	0.476818	14.7115	15.6636	3	sb = 0.05
1000000	1000	0.001	0.1	1e-05	0.01	1.48174	0.0559977	7.98973	0.466558	7.45211	8.28859	3	sb = 0.01
1000000	1000	0.001	0.1	1e-05	0.05	1449.62	562.713	27.489	2.41559	25.2522	30.0505	3	sb = 0.05
1000000	1000	0.001	0.1	0.0001	0.01	1.51192	0.0459338	8.42292	2.0462	6.2208	10.2656	3	sb = 0.01
1000000	1000	0.001	0.1	0.0001	0.05	1079.88	426.803	25.6949	1.44006	24.081	26.8487	3	sb = 0.05
1000000	1000	0.001	0.1	0.001	0.01	1.46861	0.0665424	7.16752	0.283786	6.91179	7.47283	3	sb = 0.01
1000000	1000	0.001	0.1	0.001	0.05	1104.75	543.974	27.2648	1.84617	25.1398	28.4746	3	sb = 0.05
1000000	1000	0.001	0.1	0.01	0.01	1.56079	0.0511336	7.65795	0.612304	7.13464	8.33134	3	sb = 0.01
1000000	1000	0.001	0.1	0.01	0.05	1756.08	262.488	28.6391	2.20043	26.4755	30.8746	3	sb = 0.05
1000000	1000	0.00178	0	1e-05	0	0.999983	5.7735e-07	1.76345	0.0177197	1.74445	1.77953	3	sb = 0
1000000	1000	0.00178	0	0.0001	0	0.999836	5.7735e-07	1.68857	0.0201301	1.66771	1.70788	3	sb = 0
1000000	1000	0.00178	0	0.001	0	0.999113	1.43643e-05	1.23727	0.00479161	1.23285	1.24236	3	sb = 0
1000000	1000	0.00178	0	0.01	0	0.998387	2.20681e-05	0.43373	0.0135299	0.418502	0.444367	3	sb = 0
1000000	1000	0.00178	0.01	1e-05	0.01	1.3101	0.0326821	6.60562	0.64199	5.97987	7.26271	3	sb = 0.01
1000000	1000	0.00178	0.01	1e-05	0.05	108.735	29.8263	20.1919	1.08762	18.9891	21.1061	3	sb = 0.05
1000000	1000	0.00178	0.01	0.0001	0.01	1.25449	0.0382053	5.71414	0.812832	4.94919	6.56761	3	sb = 0.01
1000000	1000	0.00178	0.01	0.0001	0.05	84.46	24.596	20.445	0.470709	20.1051	20.9822	3	sb = 0.05
1000000	1000	0.00178	0.01	0.001	0.01	1.29644	0.0253179	5.42794	0.440004	4.98523	5.86519	3	sb = 0.01
1000000	1000	0.00178	0.01	0.001	0.05	99.0929	33.7483	22.5404	1.37663	20.9633	23.5017	3	sb = 0.05
1000000	1000	0.00178	0.01	0.01	0.01	1.31745	0.0380759	5.34122	0.846857	4.45017	6.13558	3	sb = 0.01
1000000	1000	0.00178	0.01	0.01	0.05	83.5378	12.9569	19.7691	2.02595	18.1506	22.0412	3	sb = 0.05
1000000	1000	0.00178	0.1	1e-05	0.01	1.6634	0.144267	9.98047	2.33029	7.83328	12.4585	3	sb = 0.01
1000000	1000	0.00178	0.1	1e-05	0.05	7128.15	4328.46	34.2364	2.13208	32.1881	36.4434	3	sb = 0.05
1000000	1000	0.00178	0.1	0.0001	0.01	1.68709	0.0932864	10.3725	2.65119	8.56796	13.4164	3	sb = 0.01
1000000	1000	0.00178	0.1	0.0001	0.05	5699.29	1614.77	34.053	3.04929	31.1299	37.2145	3	sb = 0.05
1000000	1000	0.00178	0.1	0.001	0.01	1.59394	0.0566272	10.7605	1.89602	8.63766	12.2857	3	sb = 0.01
1000000	1000	0.00178	0.1	0.001	0.05	4211.26	1221.76	34.0144	1.15941	32.7323	34.9891	3	sb = 0.05
1000000	1000	0.00178	0.1	0.01	0.01	1.57202	0.0573148	8.69212	0.712353	7.9436	9.36173	3	sb = 0.01
1000000	1000	0.00178	0.1	0.01	0.05	3439.3	1736.8	31.8667	2.80165	28.6411	33.6932	3	sb = 0.05
1000000	1000	0.00316	0	1e-05	0	0.999969	5.7735e-07	3.08725	0.0300293	3.06981	3.12192	3	sb = 0
1000000	1000	0.00316	0	0.0001	0	0.99971	2.51661e-06	3.0425	0.00694259	3.03485	3.04841	3	sb = 0
1000000	1000	0.00316	0	0.001	0	0.998417	1.12398e-05	2.18022	0.0213424	2.15808	2.20066	3	sb = 0
1000000	1000	0.00316	0	0.01	0	0.997159	1.41774e-05	0.746097	0.00225413	0.743517	0.747685	3	sb = 0
1000000	1000	0.00316	0.01	1e-05	0.01	1.31338	0.0444429	7.74124	0.430316	7.24952	8.04902	3	sb = 0.01
1000000	1000	0.00316	0.01	1e-05	0.05	169.307	1.94884	22.1944	0.969268	21.162	23.085	3	sb = 0.05
1000000	1000	0.00316	0.01	0.0001	0.01	1.35564	0.0192003	6.89426	1.48538	5.18095	7.82004	3	sb = 0.01
1000000	1000	0.00316	0.01	0.0001	0.05	208.691	10.1805	24.4276	3.2966	21.2583	27.8382	3	sb = 0.05
1000000	1000	0.00316	0.01	0.001	0.01	1.39678	0.0661376	8.96015	1.16162	8.21362	10.2985	3	sb = 0.01
1000000	1000	0.00316	0.01	0.001	0.05	184.926	0.977517	21.5157	1.55589	20.1472	23.208	3	sb = 0.05
1000000	1000	0.00316	0.01	0.01	0.01	1.35793	0.0193026	6.14094	1.28754	5.38617	7.6276	3	sb = 0.01
1000000	1000	0.00316	0.01	0.01	0.05	142.009	54.8139	22.4847	2.2691	20.1327	24.6606	3	sb = 0.05
1000000	1000	0.00316	0.1	1e-05	0.01	1.81109	0.113599	13.9058	2.40311	12.4859	16.6804	3	sb = 0.01
1000000	1000	0.00316	0.1	1e-05	0.05	17671.6	4390.83	41.0498	1.1301	40.1144	42.3055	3	sb = 0.05
1000000	1000	0.00316	0.1	0.0001	0.01	1.87282	0.232091	13.7088	3.79464	9.64433	17.1586	3	sb = 0.01
1000000	1000	0.00316	0.1	0.0001	0.05	18997.8	5996.89	38.2003	2.14331	35.9605	40.2319	3	sb = 0.05
1000000	1000	0.00316	0.1	0.001	0.01	1.6778	0.0502555	11.5839	0.46069	11.1348	12.0553	3	sb = 0.01
1000000	1000	0.00316	0.1	0.001	0.05	17663.8	6935.5	38.4533	1.61948	37.3218	40.3084	3	sb = 0.05
1000000	1000	0.00316	0.1	0.01	0.01	1.72973	0.0271215	9.32286	0.669007	8.68271	10.0174	3	sb = 0.01
1000000	1000	0.00316	0.1	0.01	0.05	17037.9	7189.79	37.181	6.18891	31.011	43.3886	3	sb = 0.05
1000000	1000	0.00562	0	1e-05	0	0.999945	1.1547e-06	5.58296	0.0579872	5.51772	5.62864	3	sb = 0
1000000	1000	0.00562	0	0.0001	0	0.999486	7.0946e-06	5.37818	0.0295057	5.34452	5.39957	3	sb = 0
1000000	1000	0.00562	0	0.001	0	0.997189	2.25389e-05	3.87817	0.0314191	3.84238	3.90122	3	sb = 0
1000000	1000	0.00562	0	0.01	0	0.994977	1.40475e-05	1.32021	0.018619	1.29894	1.33354	3	sb = 0
1000000	1000	0.00562	0.01	1e-05	0.01	1.38016	0.0741729	10.3214	0.616232	9.61031	10.7002	3	sb = 0.01
1000000	1000	0.00562	0.01	1e-05	0.05	488.506	97.1597	28.3627	3.31608	26.381	32.191	3	sb = 0.05
1000000	1000	0.00562	0.01	0.0001	0.01	1.45223	0.0450602	12.3333	0.876526	11.5062	13.2521	3	sb = 0.01
1000000	1000	0.00562	0.01	0.0001	0.05	782.081	335.573	31.1433	1.96959	29.2268	33.162	3	sb = 0.05
1000000	1000	0.00562	0.01	0.001	0.01	1.45396	0.082897	9.72222	0.612259	9.35859	10.4291	3	sb = 0.01
1000000	1000	0.00562	0.01	0.001	0.05	402.965	87.6007	28.277	4.25215	23.393	31.1558	3	sb = 0.05
1000000	1000	0.00562	0.01	0.01	0.01	1.41156	0.0312036	7.82682	0.583516	7.28821	8.44672	3	sb = 0.01
1000000	1000	0.00562	0.01	0.01	0.05	830.1	455.073	28.8939	2.26335	26.2833	30.3057	3	sb = 0.05
1000000	1000	0.00562	0.1	1e-05	0.01	1.91518	0.0065156	17.0626	2.09139	15.4021	19.4114	3	sb = 0.01
1000000	1000	0.00562	0.1	1e-05	0.05	101126	52649.3	46.5432	5.50332	40.2003	50.0488	3	sb = 0.05
1000000	1000	0.00562	0.1	0.0001	0.01	2.12502	0.176455	18.7119	2.81562	15.6868	21.2561	3	sb = 0.01
1000000	1000	0.00562	0.1	0.0001	0.05	88359.6	15190.2	47.2787	2.85873	44.6591	50.3279	3	sb = 0.05
1000000	1000	0.00562	0.1	0.001	0.01	1.99257	0.0729383	21.0165	1.6573	19.8678	22.9164	3	sb = 0.01
1000000	1000	0.00562	0.1	0.001	0.05	92531.3	9942.99	48.5088	4.41741	44.5631	53.2811	3	sb = 0.05
1000000	1000	0.00562	0.1	0.01	0.01	2.0938	0.0641247	15.3295	0.897942	14.507	16.2875	3	sb = 0.01
1000000	1000	0.00562	0.1	0.01	0.05	85569.5	64337	45.7344	1.74036	44.437	47.7122	3	sb = 0.05
1000000	1000	0.01	0	1e-05	0	0.999901	1e-06	9.94734	0.0280092	9.91562	9.96867	3	sb = 0
1000000	1000	0.01	0	0.0001	0	0.999091	5.68624e-06	9.56968	0.0407719	9.52621	9.60707	3	sb = 0
1000000	1000	0.01	0	0.001	0	0.994993	7.36637e-05	6.9693	0.086885	6.87223	7.0398	3	sb = 0
1000000	1000	0.01	0	0.01	0	0.99101	9.95507e-05	2.38543	0.0510349	2.33645	2.4383	3	sb = 0
1000000	1000	0.01	0.01	1e-05	0.01	1.57412	0.166232	19.2885	2.11663	17.167	21.4002	3	sb = 0.01
1000000	1000	0.01	0.01	1e-05	0.05	1948.78	377.133	38.6904	2.58704	36.5608	41.5694	3	sb = 0.05
1000000	1000	0.01	0.01	0.0001	0.01	1.55783	0.120147	20.2297	4.19576	15.4786	23.4266	3	sb = 0.01
1000000	1000	0.01	0.01	0.0001	0.05	1007.89	371.51	35.3916	3.30789	31.5736	37.397	3	sb = 0.05
1000000	1000	0.01	0.01	0.001	0.01	1.4823	0.0489935	14.6412	3.32583	10.8053	16.7179	3	sb = 0.01
1000000	1000	0.01	0.01	0.001	0.05	2220.99	1498.58	36.7911	3.14223	34.553	40.3834	3	sb = 0.05
1000000	1000	0.01	0.01	0.01	0.01	1.5572	0.0799698	10.4117	2.33348	7.75021	12.1066	3	sb = 0.01
1000000	1000	0.01	0.01	0.01	0.05	846.006	70.1812	37.3599	6.24836	32.5555	44.4237	3	sb = 0.05
1000000	1000	0.01	0.1	1e-05	0.01	2.20639	0.188144	24.2115	4.19758	19.8683	28.2464	3	sb = 0.01
1000000	1000	0.01	0.1	1e-05	0.05	937319	927310	62.8405	6.19144	58.7955	69.9681	3	sb = 0.05
1000000	1000	0.01	0.1	0.0001	0.01	2.1753	0.129974	26.7242	2.66408	24.086	29.4134	3	sb = 0.01
1000000	1000	0.01	0.1	0.0001	0.05	466300	196546	63.4922	0.921212	62.8117	64.5405	3	sb = 0.05
1000000	1000	0.01	0.1	0.001	0.01	2.51331	0.306255	26.5863	5.85066	20.3689	31.9837	3	sb = 0.01
1000000	1000	0.01	0.1	0.001	0.05	720794	240569	63.8186	2.03554	61.9717	66.0011	3	sb = 0.05
1000000	1000	0.01	0.1	0.01	0.01	2.25773	0.0331836	19.9128	0.515751	19.5645	20.5053	3	sb = 0.01
1000000	1000	0.01	0.1	0.01	0.05	599176	253907	59.1995	3.00093	55.8106	61.5199	3	sb = 0.05
1000000	1000	0.01778	0	1e-05	0	0.999823	5.7735e-07	17.6808	0.10774	17.6032	17.8038	3	sb = 0
1000000	1000	0.01778	0	0.0001	0	0.998388	1.33167e-05	16.8967	0.0457868	16.8702	16.9496	3	sb = 0
1000000	1000	0.01778	0	0.001	0	0.991228	0.000109668	12.32	0.0939609	12.2137	12.3921	3	sb = 0
1000000	1000	0.01778	0	0.01	0	0.984246	0.000160176	4.26992	0.06738	4.19826	4.332	3	sb = 0
1000000	1000	0.01778	0.01	1e-05	0.01	1.57777	0.0534342	23.6396	2.31895	21.7553	26.2294	3	sb = 0.01
1000000	1000	0.01778	0.01	1e-05	0.05	5635.87	2919.72	52.3742	9.98125	45.6509	63.8429	3	sb = 0.05
1000000	1000	0.01778	0.01	0.0001	0.01	1.70948	0.0844999	24.0466	6.02146	17.1412	28.2027	3	sb = 0.01
1000000	1000	0.01778	0.01	0.0001	0.05	3089.09	1628.68	49.7052	2.8948	46.9313	52.7074	3	sb = 0.05
1000000	1000	0.01778	0.01	0.001	0.01	1.52564	0.0489689	21.884	2.66106	19.9883	24.9261	3	sb = 0.01
1000000	1000	0.01778	0.01	0.001	0.05	5229.03	1314.47	43.3377	2.6881	41.3651	46.3995	3	sb = 0.05
1000000	1000	0.01778	0.01	0.01	0.01	1.50602	0.0449584	14.3396	1.37852	12.8167	15.5022	3	sb = 0.01
1000000	1000	0.01778	0.01	0.01	0.05	6389.99	3684.98	44.8523	4.91199	40.7651	50.3016	3	sb = 0.05
1000000	1000	0.01778	0.1	1e-05	0.01	2.71067	0.023404	40.2205	5.13375	35.1579	45.4226	3	sb = 0.01
1000000	1000	0.01778	0.1	1e-05	0.05	5.87039e+06	1.46145e+06	82.5717	3.68771	78.5273	85.7478	3	sb = 0.05
1000000	1000	0.01778	0.1	0.0001	0.01	2.67199	0.14736	36.1273	1.70031	34.1895	37.3695	3	sb = 0.01
1000000	1000	0.01778	0.1	0.0001	0.05	1.65269e+07	5.41341e+06	85.4618	6.4895	77.9707	89.3695	3	sb = 0.05
1000000	1000	0.01778	0.1	0.001	0.01	2.58131	0.0273917	34.9095	2.71681	32.4934	37.8504	3	sb = 0.01
1000000	1000	0.01778	0.1	0.001	0.05	1.40897e+07	7.29345e+06	82.9143	4.67454	78.3971	87.7317	3	sb = 0.05
1000000	1000	0.01778	0.1	0.01	0.01	2.77838	0.315984	32.9706	2.65201	30.8806	35.9539	3	sb = 0.01
1000000	1000	0.01778	0.1	0.01	0.05	7.25286e+06	2.0348e+06	77.6759	3.94967	73.405	81.1968	3	sb = 0.05
1000000	1000	0.03162	0	1e-05	0	0.999687	1.1547e-06	31.461	0.0957512	31.3874	31.5692	3	sb = 0
1000000	1000	0.03162	0	0.0001	0	0.997118	1.02144e-05	30.1711	0.0335732	30.1423	30.208	3	sb = 0
1000000	1000	0.03162	0	0.001	0	0.984292	5.92143e-05	21.8754	0.117725	21.7591	21.9945	3	sb = 0
1000000	1000	0.03162	0	0.01	0	0.972159	0.000387512	7.45279	0.209027	7.29507	7.68987	3	sb = 0
1000000	1000	0.03162	0.01	1e-05	0.01	2.00524	0.201397	40.3737	3.50607	37.9406	44.3925	3	sb = 0.01
1000000	1000	0.03162	0.01	1e-05	0.05	17647.5	4750.4	70.3687	10.6294	58.1215	77.1905	3	sb = 0.05
1000000	1000	0.03162	0.01	0.0001	0.01	1.85347	0.0758151	39.7231	4.75514	35.7822	45.0047	3	sb = 0.01
1000000	1000	0.03162	0.01	0.0001	0.05	19713.5	4569.95	68.8886	5.52558	62.9321	73.8473	3	sb = 0.05
1000000	1000	0.03162	0.01	0.001	0.01	1.75606	0.158853	41.9447	5.24832	37.0574	47.4917	3	sb = 0.01
1000000	1000	0.03162	0.01	0.001	0.05	17871.4	10649.6	63.5791	6.91788	57.2156	70.9425	3	sb = 0.05
1000000	1000	0.03162	0.01	0.01	0.01	1.62565	0.066229	21.6534	0.144424	21.4895	21.7621	3	sb = 0.01
1000000	1000	0.03162	0.01	0.01	0.05	11558.8	6578.34	52.3846	1.63753	50.6171	53.8502	3	sb = 0.05
1000000	1000	0.03162	0.1	1e-05	0.01	3.4146	0.085558	53.0766	5.465	48.5101	59.1316	3	sb = 0.01
1000000	1000	0.03162	0.1	1e-05	0.05	1.03545e+08	8.64392e+07	106.781	8.89895	96.5289	112.512	3	sb = 0.05
1000000	1000	0.03162	0.1	0.0001	0.01	3.52766	0.318201	57.0997	2.40596	54.3227	58.5586	3	sb = 0.01
1000000	1000	0.03162	0.1	0.0001	0.05	6.85538e+07	2.43787e+07	106.849	1.9628	105.08	108.96	3	sb = 0.05
1000000	1000	0.03162	0.1	0.001	0.01	3.37298	0.145295	55.8714	4.71809	50.4582	59.1105	3	sb = 0.01
1000000	1000	0.03162	0.1	0.001	0.05	1.24999e+08	7.87498e+07	111.616	11.3344	99.3899	121.774	3	sb = 0.05
1000000	1000	0.03162	0.1	0.01	0.01	3.02211	0.335959	43.1165	6.10868	37.5372	49.6438	3	sb = 0.01
1000000	1000	0.03162	0.1	0.01	0.05	7.77143e+07	9.84282e+06	99.887	6.20782	93.028	105.12	3	sb = 0.05
1000000	1000	0.05623	0	1e-05	0	0.999444	2.08167e-06	56.0071	0.298059	55.7029	56.2986	3	sb = 0
1000000	1000	0.05623	0	0.0001	0	0.99488	2.63122e-05	53.6111	0.193234	53.4028	53.7846	3	sb = 0
1000000	1000	0.05623	0	0.001	0	0.972363	0.000204525	38.7992	0.111153	38.6737	38.8853	3	sb = 0
1000000	1000	0.05623	0	0.01	0	0.95069	0.000413592	13.3344	0.574631	12.8705	13.9772	3	sb = 0
1000000	1000	0.05623	0.01	1e-05	0.01	1.97571	0.089541	81.2039	6.76115	74.8269	88.2929	3	sb = 0.01
1000000	1000	0.05623	0.01	1e-05	0.05	113495	47118	102.546	2.4251	100.594	105.261	3	sb = 0.05
1000000	1000	0.05623	0.01	0.0001	0.01	2.13514	0.0550135	68.7457	6.78118	61.1669	74.2396	3	sb = 0.01
1000000	1000	0.05623	0.01	0.0001	0.05	89088.4	62594.5	97.2939	5.34632	91.5812	102.177	3	sb = 0.05
1000000	1000	0.05623	0.01	0.001	0.01	1.98888	0.0610302	59.8558	8.57444	54.8145	69.7561	3	sb = 0.01
1000000	1000	0.05623	0.01	0.001	0.05	86614	32190.2	95.9447	0.868208	95.0893	96.8252	3	sb = 0.05
1000000	1000	0.05623	0.01	0.01	0.01	1.63108	0.0538554	33.9218	1.24705	32.9314	35.3222	3	sb = 0.01
1000000	1000	0.05623	0.01	0.01	0.05	77895.4	35471	83.7178	4.5785	80.6968	88.9857	3	sb = 0.05
1000000	1000	0.05623	0.1	1e-05	0.01	5.03815	0.213578	100.082	2.49185	97.8785	102.786	3	sb = 0.01
1000000	1000	0.05623	0.1	1e-05	0.05	5.46684e+09	3.56454e+09	155.42	11.9074	141.815	163.947	3	sb = 0.05
1000000	1000	0.05623	0.1	0.0001	0.01	4.52323	0.397593	90.9355	7.47151	82.3655	96.0805	3	sb = 0.01
1000000	1000	0.05623	0.1	0.0001	0.05	4.49151e+09	2.66381e+09	145.739	10.3155	135.226	155.845	3	sb = 0.05
1000000	1000	0.05623	0.1	0.001	0.01	4.60547	0.0883839	86.8505	3.84241	83.7134	91.1362	3	sb = 0.01
1000000	1000	0.05623	0.1	0.001	0.05	3.74868e+09	4.27647e+09	149.022	8.24669	140.316	156.716	3	sb = 0.05
1000000	1000	0.05623	0.1	0.01	0.01	4.04159	0.267489	65.71	1.57163	64.6416	67.5146	3	sb = 0.01
1000000	1000	0.05623	0.1	0.01	0.05	3.09052e+09	2.16413e+09	149.061	8.65429	140.496	157.802	3	sb = 0.05
1000000	1000	0.1	0	1e-05	0	0.999008	4.50925e-06	99.6611	0.280644	99.342	99.8696	3	sb = 0
1000000	1000	0.1	0	0.0001	0	0.99092	2.1362e-05	95.6026	0.212816	95.4202	95.8364	3	sb = 0
1000000	1000	0.1	0	0.001	0	0.950617	0.00120746	69.695	1.79773	68.5811	71.769	3	sb = 0
1000000	1000	0.1	0	0.01	0	0.911205	0.00670074	25.3097	3.89121	21.2118	28.9546	3	sb = 0
1000000	1000	0.1	0.01	1e-05	0.01	2.28821	0.216881	121.668	5.06795	116.429	126.545	3	sb = 0.01
1000000	1000	0.1	0.01	1e-05	0.05	852679	905838	151.573	7.35428	143.423	157.713	3	sb = 0.05
1000000	1000	0.1	0.01	0.0001	0.01	2.35179	0.315321	115.019	3.97407	111.677	119.413	3	sb = 0.01
1000000	1000	0.1	0.01	0.0001	0.05	823456	437425	149.672	10.7604	137.744	158.648	3	sb = 0.05
1000000	1000	0.1	0.01	0.001	0.01	2.17893	0.279157	109.531	7.49185	101.81	116.77	3	sb = 0.01
1000000	1000	0.1	0.01	0.001	0.05	381273	13726.6	139.966	7.53057	134.839	148.612	3	sb = 0.05
1000000	1000	0.1	0.01	0.01	0.01	1.5534	0.0229902	54.906	4.28883	52.0929	59.8423	3	sb = 0.01
1000000	1000	0.1	0.01	0.01	0.05	344918	39552.4	123.162	2.53317	121.381	126.062	3	sb = 0.05
1000000	1000	0.1	0.1	1e-05	0.01	7.68477	1.19166	141.045	6.17962	134.361	146.551	3	sb = 0.01
1000000	1000	0.1	0.1	1e-05	0.05	1.95837e+11	2.18083e+10	216.471	16.8078	197.193	228.052	3	sb = 0.05	X
1000000	1000	0.1	0.1	0.0001	0.01	7.07172	0.674891	139.929	0.970185	139.016	140.948	3	sb = 0.01
1000000	1000	0.1	0.1	0.0001	0.05	1.7742e+11	4.99907e+10	221.89	4.17544	219.32	226.708	3	sb = 0.05	X
1000000	1000	0.1	0.1	0.001	0.01	6.43896	0.181852	134.041	7.34459	127.416	141.939	3	sb = 0.01
1000000	1000	0.1	0.1	0.001	0.05	2.45171e+11	1.37441e+11	211.867	18.4768	200.907	233.199	3	sb = 0.05	X
1000000	1000	0.1	0.1	0.01	0.01	4.58616	0.560112	91.9192	6.69914	84.6675	97.8771	3	sb = 0.01
1000000	1000	0.1	0.1	0.01	0.05	2.82578e+11	2.56672e+11	206.22	3.27049	202.772	209.278	3	sb = 0.05	X
1000000	1000	0.17783	0	1e-05	0	0.998242	1.73205e-06	177.084	0.127533	177.008	177.231	3	sb = 0	X
1000000	1000	0.17783	0	0.0001	0	0.984001	4.02658e-05	169.307	0.290611	168.972	169.481	3	sb = 0	X
1000000	1000	0.17783	0	0.001	0	0.914813	0.00239627	122.56	5.94026	117.337	129.022	3	sb = 0
1000000	1000	0.17783	0	0.01	0	0.816079	0.00697003	53.1398	2.13153	50.982	55.2441	3	sb = 0
1000000	1000	0.17783	0.01	1e-05	0.01	2.77093	0.249414	198.758	18.7911	183.729	219.826	3	sb = 0.01	X
1000000	1000	0.17783	0.01	1e-05	0.05	7.88761e+06	6.86476e+06	240.439	6.65352	233.524	246.796	3	sb = 0.05	X
1000000	1000	0.17783	0.01	0.0001	0.01	2.76136	0.23926	193.261	11.2544	180.402	201.317	3	sb = 0.01	X
1000000	1000	0.17783	0.01	0.0001	0.05	3.10154e+06	614201	241.298	7.96485	233.111	249.021	3	sb = 0.05	X
1000000	1000	0.17783	0.01	0.001	0.01	2.33474	0.0448974	179.983	10.4109	167.962	186.119	3	sb = 0.01	X
1000000	1000	0.17783	0.01	0.001	0.05	4.73385e+06	2.84578e+06	235.276	10.5519	224.417	245.492	3	sb = 0.05	X
1000000	1000	0.17783	0.01	0.01	0.01	1.63105	0.0421252	107.726	9.88112	98.1237	117.864	3	sb = 0.01
1000000	1000	0.17783	0.01	0.01	0.05	1.02738e+06	384944	200.428	9.2068	194.62	211.043	3	sb = 0.05	X
1000000	1000	0.17783	0.1	1e-05	0.01	13.1536	2.54008	223.597	3.37918	221.255	227.471	3	sb = 0.01	X
1000000	1000	0.17783	0.1	1e-05	0.05	103656816201186	25447710142394	328.291	14.4193	311.79	338.466	3	sb = 0.05	X
1000000	1000	0.17783	0.1	0.0001	0.01	11.6469	0.262482	232.499	12.179	220.688	245.015	3	sb = 0.01	X
1000000	1000	0.17783	0.1	0.0001	0.05	6.84983e+13	3.13239e+13	319.68	8.35019	314.292	329.299	3	sb = 0.05	X
1000000	1000	0.17783	0.1	0.001	0.01	11.8333	0.865924	241.161	13.377	231.384	256.406	3	sb = 0.01	X
1000000	1000	0.17783	0.1	0.001	0.05	7.80878e+13	68310878296387	319.147	3.81431	316.261	323.471	3	sb = 0.05	X
1000000	1000	0.17783	0.1	0.01	0.01	6.45937	0.58158	166.318	7.40359	158.796	173.598	3	sb = 0.01
1000000	1000	0.17783	0.1	0.01	0.05	4.65296e+13	4.46751e+13	301.153	24.3363	279.602	327.546	3	sb = 0.05	X
1000000	1000	0.31623	0	1e-05	0	0.996873	5e-06	314.664	0.367938	314.239	314.882	3	sb = 0	X
1000000	1000	0.31623	0	0.0001	0	0.971678	2.28108e-05	301.023	0.236006	300.793	301.265	3	sb = 0	X
1000000	1000	0.31623	0	0.001	0	0.841377	0.00290178	234.01	2.00115	231.829	235.761	3	sb = 0	X
1000000	1000	0.31623	0	0.01	0	0.621339	0.00873707	121.232	4.38514	118.627	126.295	3	sb = 0
1000000	1000	0.31623	0.01	1e-05	0.01	3.39082	0.129439	336.505	14.771	324.485	352.994	3	sb = 0.01	X
1000000	1000	0.31623	0.01	1e-05	0.05	2.74093e+08	2.29409e+08	397.135	9.6204	386.03	402.93	3	sb = 0.05	X
1000000	1000	0.31623	0.01	0.0001	0.01	3.5116	0.117172	332.24	20.3787	320.17	355.769	3	sb = 0.01	X
1000000	1000	0.31623	0.01	0.0001	0.05	8.36898e+07	3.83398e+07	389.522	12.8656	381.384	404.355	3	sb = 0.05	X
1000000	1000	0.31623	0.01	0.001	0.01	2.65808	0.19357	318.817	20.1029	300.788	340.494	3	sb = 0.01	X
1000000	1000	0.31623	0.01	0.001	0.05	6.5092e+07	3.45454e+07	365.563	14.4744	354.216	381.864	3	sb = 0.05	X
1000000	1000	0.31623	0.01	0.01	0.01	1.09786	0.0656361	177.867	10.6028	165.697	185.108	3	sb = 0.01	X
1000000	1000	0.31623	0.01	0.01	0.05	6.10814e+06	1.98901e+06	320.924	10.6029	312.59	332.859	3	sb = 0.05	X
1000000	1000	0.31623	0.1	1e-05	0.01	27.2813	3.0596	404.02	3.31758	402.072	407.851	3	sb = 0.01	X
1000000	1000	0.31623	0.1	1e-05	0.05	3.11648e+17	3.5851e+17	516.905	13.3847	505.268	531.532	3	sb = 0.05	X
1000000	1000	0.31623	0.1	0.0001	0.01	25.3875	2.01046	388.797	5.90939	382.256	393.751	3	sb = 0.01	X
1000000	1000	0.31623	0.1	0.0001	0.05	2.49931e+17	1.45979e+17	534.217	25.9853	514.376	563.631	3	sb = 0.05	X
1000000	1000	0.31623	0.1	0.001	0.01	19.6302	0.575601	382.423	15.9583	370.509	400.554	3	sb = 0.01	X
1000000	1000	0.31623	0.1	0.001	0.05	3.26784e+17	1.47148e+17	509.992	8.64979	501.259	518.556	3	sb = 0.05	X
1000000	1000	0.31623	0.1	0.01	0.01	8.15913	0.166143	263.782	16.5324	246.778	279.798	3	sb = 0.01	X
1000000	1000	0.31623	0.1	0.01	0.05	1.60461e+16	2599975233907700	455.647	2.19974	454.02	458.15	3	sb = 0.05	X
1000000	1000	0.56234	0	1e-05	0	0.994451	2.51661e-06	559.253	0.301628	559.013	559.592	3	sb = 0	X
1000000	1000	0.56234	0	0.0001	0	0.950265	0.000107014	535.528	0.585522	535.166	536.204	3	sb = 0	X
1000000	1000	0.56234	0	0.001	0	0.718518	0.00226997	427.642	11.4033	418.866	440.531	3	sb = 0	X
1000000	1000	0.56234	0	0.01	0	0.338691	0.0166315	241.247	11.9485	227.887	250.911	3	sb = 0	X
1000000	1000	0.56234	0.01	1e-05	0.01	4.68993	0.540416	586.25	7.78919	579.836	594.917	3	sb = 0.01	X
1000000	1000	0.56234	0.01	1e-05	0.05	4.61997e+09	2.19476e+09	652.787	29.3977	628.36	685.414	3	sb = 0.05
1000000	1000	0.56234	0.01	0.0001	0.01	4.17945	0.235193	582.171	17.3173	562.868	596.344	3	sb = 0.01	X
1000000	1000	0.56234	0.01	0.0001	0.05	6.63176e+09	3.56103e+09	659.87	25.7509	640.867	689.177	3	sb = 0.05
1000000	1000	0.56234	0.01	0.001	0.01	3.35609	0.594288	546.332	15.9242	531.008	562.796	3	sb = 0.01	X
1000000	1000	0.56234	0.01	0.001	0.05	3.44723e+09	2.97668e+09	634.092	6.73922	627.169	640.631	3	sb = 0.05	X
1000000	1000	0.56234	0.01	0.01	0.01	0.570207	0.049284	308.217	12.0239	298.752	321.746	3	sb = 0.01	X
1000000	1000	0.56234	0.01	0.01	0.05	1.18187e+08	6.87154e+07	540.587	13.4693	530.948	555.977	3	sb = 0.05	X
1000000	1000	0.56234	0.1	1e-05	0.01	80.4061	4.78733	672.868	18.3701	651.817	685.651	3	sb = 0.01
1000000	1000	0.56234	0.1	1e-05	0.05	5.05256e+21	8.81906e+20	850.093	14.6812	833.482	861.331	3	sb = 0.05
1000000	1000	0.56234	0.1	0.0001	0.01	79.9139	7.48031	674.981	16.2839	656.195	685.071	3	sb = 0.01
1000000	1000	0.56234	0.1	0.0001	0.05	4.54984e+21	2.72508e+21	812.204	10.1177	800.531	818.469	3	sb = 0.05
1000000	1000	0.56234	0.1	0.001	0.01	60.5269	7.3918	655.637	28.5235	622.908	675.193	3	sb = 0.01
1000000	1000	0.56234	0.1	0.001	0.05	3.60681e+21	2.01016e+21	811.198	54.5781	753.571	862.105	3	sb = 0.05
1000000	1000	0.56234	0.1	0.01	0.01	8.35498	0.789409	434.408	5.37196	428.431	438.833	3	sb = 0.01	X
1000000	1000	0.56234	0.1	0.01	0.05	1.86868e+20	1.49654e+20	726.81	26.493	711.345	757.401	3	sb = 0.05
1000000	1000	1	0	1e-05	0	0.990147	5.50757e-06	994.25	0.233338	994.002	994.465	3	sb = 0
1000000	1000	1	0	0.0001	0	0.91297	0.000189022	954.302	0.226284	954.042	954.46	3	sb = 0
1000000	1000	1	0	0.001	0	0.532118	0.00935501	796.956	7.70134	790.268	805.376	3	sb = 0
1000000	1000	1	0	0.01	0	0.0716143	0.00505917	502.378	2.91431	499.047	504.462	3	sb = 0	X
1000000	1000	1	0.01	1e-05	0.01	6.81726	0.100289	1057.82	39.2778	1016.29	1094.37	3	sb = 0.01
1000000	1000	1	0.01	1e-05	0.05	8.54021e+11	4.85514e+11	1134.07	26.739	1103.66	1153.9	3	sb = 0.05
1000000	1000	1	0.01	0.0001	0.01	6.57954	0.417057	1035.04	32.8884	1004.62	1069.94	3	sb = 0.01
1000000	1000	1	0.01	0.0001	0.05	3.60224e+11	2.17836e+11	1134.9	30.6016	1116.04	1170.21	3	sb = 0.05
1000000	1000	1	0.01	0.001	0.01	2.92555	0.434188	924.433	9.52345	913.749	932.031	3	sb = 0.01
1000000	1000	1	0.01	0.001	0.05	1.85273e+11	9.62279e+10	1061.27	19.4125	1040.51	1078.97	3	sb = 0.05
1000000	1000	1	0.01	0.01	0.01	0.130339	0.00516621	562.968	12.2206	549.199	572.525	3	sb = 0.01	X
1000000	1000	1	0.01	0.01	0.05	4.87505e+08	6.32677e+08	888.5	11.136	877.48	899.748	3	sb = 0.05
1000000	1000	1	0.1	1e-05	0.01	416.265	31.2914	1172.13	18.9502	1150.42	1185.38	3	sb = 0.01
1000000	1000	1	0.1	1e-05	0.05	2.19048e+28	2.85523e+28	1372.93	24.7163	1351.52	1399.98	3	sb = 0.05
1000000	1000	1	0.1	0.0001	0.01	370.753	51.5187	1173.74	30.003	1144.21	1204.2	3	sb = 0.01
1000000	1000	1	0.1	0.0001	0.05	6.50068e+27	2.6309e+27	1358.04	1.17151	1357.31	1359.39	3	sb = 0.05
1000000	1000	1	0.1	0.001	0.01	172.475	29.827	1125.57	17.9444	1111.4	1145.75	3	sb = 0.01
1000000	1000	1	0.1	0.001	0.05	1.12512e+28	5.33087e+27	1353.49	40.7622	1312.73	1394.25	3	sb = 0.05
1000000	1000	1	0.1	0.01	0.01	4.41881	1.12375	769.024	19.0243	754.159	790.464	3	sb = 0.01
1000000	1000	1	0.1	0.01	0.05	1.3732e+25	5.87293e+24	1192.69	45.9548	1162.78	1245.61	3	sb = 0.05
1000000	2000	0.001	0	1e-05	0	0.999981	5.7735e-07	1.94711	0.0264617	1.91714	1.96727	3	sb = 0
1000000	2000	0.001	0	0.0001	0	0.999836	6.9282e-06	1.82759	0.0672225	1.7551	1.88788	3	sb = 0
1000000	2000	0.001	0	0.001	0	0.999306	1.90088e-05	1.1317	0.0230892	1.10509	1.14653	3	sb = 0
1000000	2000	0.001	0	0.01	0	0.999042	2.20303e-05	0.30247	0.0144819	0.289092	0.317848	3	sb = 0
1000000	2000	0.001	0.01	1e-05	0.01	1.47736	0.149961	9.3079	0.903872	8.4222	10.2289	3	sb = 0.01
1000000	2000	0.001	0.01	1e-05	0.05	2056.02	1008.35	35.4214	1.97349	33.2357	37.0726	3	sb = 0.05
1000000	2000	0.001	0.01	0.0001	0.01	1.51641	0.156743	9.07168	1.1793	8.12028	10.3911	3	sb = 0.01
1000000	2000	0.001	0.01	0.0001	0.05	1749.29	466.474	33.9122	0.851854	33.0987	34.7978	3	sb = 0.05
1000000	2000	0.001	0.01	0.001	0.01	1.54666	0.0455579	9.42892	0.979678	8.29772	10.003	3	sb = 0.01
1000000	2000	0.001	0.01	0.001	0.05	2808.19	1612.24	35.6133	2.71467	33.2032	38.5542	3	sb = 0.05
1000000	2000	0.001	0.01	0.01	0.01	1.53752	0.134886	8.62425	1.90171	7.15874	10.7732	3	sb = 0.01
1000000	2000	0.001	0.01	0.01	0.05	1551.58	170.663	31.015	1.66554	29.3983	32.7254	3	sb = 0.05
1000000	2000	0.001	0.1	1e-05	0.01	2.25334	0.151368	16.9451	1.09939	16.1982	18.2075	3	sb = 0.01
1000000	2000	0.001	0.1	1e-05	0.05	2.24011e+06	538624	54.1061	2.44493	52.0914	56.8262	3	sb = 0.05
1000000	2000	0.001	0.1	0.0001	0.01	2.46607	0.156348	16.8479	4.4607	11.8908	20.538	3	sb = 0.01
1000000	2000	0.001	0.1	0.0001	0.05	1.63637e+06	1.29133e+06	54.4755	0.770206	53.7054	55.2458	3	sb = 0.05
1000000	2000	0.001	0.1	0.001	0.01	2.31068	0.281441	15.899	1.80105	14.203	17.7893	3	sb = 0.01
1000000	2000	0.001	0.1	0.001	0.05	2.24104e+06	1.04025e+06	57.4032	2.03116	55.174	59.1491	3	sb = 0.05
1000000	2000	0.001	0.1	0.01	0.01	2.43314	0.0536122	14.8422	0.783249	14.3215	15.743	3	sb = 0.01
1000000	2000	0.001	0.1	0.01	0.05	4.03209e+06	1.22574e+06	57.3851	3.21788	55.101	61.0652	3	sb = 0.05
1000000	2000	0.00178	0	1e-05	0	0.999966	5.7735e-07	3.50071	0.0146966	3.48378	3.51017	3	sb = 0
1000000	2000	0.00178	0	0.0001	0	0.999704	6.50641e-06	3.2339	0.0379625	3.1911	3.26349	3	sb = 0
1000000	2000	0.00178	0	0.001	0	0.998808	2.47049e-05	1.96666	0.0231402	1.94676	1.99205	3	sb = 0
1000000	2000	0.00178	0	0.01	0	0.998316	6.11337e-05	0.551993	0.0209694	0.530824	0.572757	3	sb = 0
1000000	2000	0.00178	0.01	1e-05	0.01	1.67945	0.0669282	13.0175	0.619479	12.4226	13.659	3	sb = 0.01
1000000	2000	0.00178	0.01	1e-05	0.05	10775.6	4773.71	40.3789	2.27185	39.035	43.0019	3	sb = 0.05
1000000	2000	0.00178	0.01	0.0001	0.01	1.58973	0.0033745	11.8922	0.259976	11.7327	12.1922	3	sb = 0.01
1000000	2000	0.00178	0.01	0.0001	0.05	6668.2	1650.66	40.3339	1.86037	38.2017	41.6267	3	sb = 0.05
1000000	2000	0.00178	0.01	0.001	0.01	1.65444	0.0357571	11.9971	1.08858	10.7409	12.6628	3	sb = 0.01
1000000	2000	0.00178	0.01	0.001	0.05	9938.1	4813.49	42.2788	1.0285	41.1228	43.0925	3	sb = 0.05
1000000	2000	0.00178	0.01	0.01	0.01	1.70509	0.126506	10.0496	1.04881	9.15974	11.2059	3	sb = 0.01
1000000	2000	0.00178	0.01	0.01	0.05	8817.65	727.462	40.7463	2.66816	37.9742	43.2967	3	sb = 0.05
1000000	2000	0.00178	0.1	1e-05	0.01	2.79146	0.428342	19.3262	3.70475	16.3907	23.4888	3	sb = 0.01
1000000	2000	0.00178	0.1	1e-05	0.05	3.24727e+07	2.09375e+07	67.8605	2.3307	65.7104	70.3373	3	sb = 0.05
1000000	2000	0.00178	0.1	0.0001	0.01	3.10997	0.304357	22.6988	3.18669	20.1283	26.2643	3	sb = 0.01
1000000	2000	0.00178	0.1	0.0001	0.05	3.40634e+07	2.1117e+07	68.0543	1.88333	65.9486	69.5776	3	sb = 0.05
1000000	2000	0.00178	0.1	0.001	0.01	2.66492	0.0719874	19.3305	2.30402	17.5381	21.9293	3	sb = 0.01
1000000	2000	0.00178	0.1	0.001	0.05	2.49844e+07	2.07431e+06	71.7561	1.3681	70.2116	72.8157	3	sb = 0.05
1000000	2000	0.00178	0.1	0.01	0.01	2.74876	0.288188	19.1174	1.16931	17.8188	20.0868	3	sb = 0.01
1000000	2000	0.00178	0.1	0.01	0.05	2.33757e+07	1.65729e+07	67.244	4.04223	62.6431	70.2249	3	sb = 0.05
1000000	2000	0.00316	0	1e-05	0	0.999939	5.7735e-07	6.21295	0.0338971	6.18019	6.24788	3	sb = 0
1000000	2000	0.00316	0	0.0001	0	0.999481	5.1316e-06	5.78946	0.0371912	5.74721	5.81721	3	sb = 0
1000000	2000	0.00316	0	0.001	0	0.997841	3.88373e-05	3.50894	0.0796704	3.42627	3.58523	3	sb = 0
1000000	2000	0.00316	0	0.01	0	0.997055	2.48797e-05	0.945383	0.0122043	0.932784	0.95715	3	sb = 0
1000000	2000	0.00316	0.01	1e-05	0.01	1.8027	0.0839547	16.3497	1.20843	15.5756	17.7422	3	sb = 0.01
1000000	2000	0.00316	0.01	1e-05	0.05	39433.7	8738.89	47.9409	1.08825	47.1512	49.1822	3	sb = 0.05
1000000	2000	0.00316	0.01	0.0001	0.01	1.86949	0.176355	13.6303	1.05122	12.8454	14.8247	3	sb = 0.01
1000000	2000	0.00316	0.01	0.0001	0.05	42748.7	21021.4	46.594	4.39202	43.5447	51.6281	3	sb = 0.05
1000000	2000	0.00316	0.01	0.001	0.01	1.9071	0.203472	18.1474	4.48916	15.4777	23.3302	3	sb = 0.01
1000000	2000	0.00316	0.01	0.001	0.05	46567.5	19730.4	46.0015	4.26228	41.3562	49.7322	3	sb = 0.05
1000000	2000	0.00316	0.01	0.01	0.01	1.91208	0.0982719	13.7743	2.91621	12.0664	17.1415	3	sb = 0.01
1000000	2000	0.00316	0.01	0.01	0.05	30824.6	8418.43	46.2499	1.08887	45.159	47.3367	3	sb = 0.05
1000000	2000	0.00316	0.1	1e-05	0.01	3.48077	0.165765	26.8585	3.96402	24.4218	31.4325	3	sb = 0.01
1000000	2000	0.00316	0.1	1e-05	0.05	5.74018e+08	2.71233e+08	83.0933	1.31664	81.9692	84.5418	3	sb = 0.05
1000000	2000	0.00316	0.1	0.0001	0.01	3.68051	0.268864	29.9402	4.82328	24.8523	34.446	3	sb = 0.01
1000000	2000	0.00316	0.1	0.0001	0.05	4.79082e+08	2.36435e+08	77.143	2.61197	75.5391	80.157	3	sb = 0.05
1000000	2000	0.00316	0.1	0.001	0.01	3.18386	0.266752	25.8781	3.30167	22.1535	28.4448	3	sb = 0.01
1000000	2000	0.00316	0.1	0.001	0.05	4.86511e+08	1.92964e+08	82.8644	3.01261	80.2724	86.1696	3	sb = 0.05
1000000	2000	0.00316	0.1	0.01	0.01	3.26551	0.0826441	22.0669	2.28199	19.4319	23.3961	3	sb = 0.01
1000000	2000	0.00316	0.1	0.01	0.05	2.29989e+08	4.88953e+07	78.4039	4.44343	74.4698	83.2234	3	sb = 0.05
1000000	2000	0.00562	0	1e-05	0	0.999891	1.52753e-06	11.1006	0.05724	11.0625	11.1664	3	sb = 0
1000000	2000	0.00562	0	0.0001	0	0.999065	4.58258e-06	10.2529	0.0584024	10.1944	10.3112	3	sb = 0
1000000	2000	0.00562	0	0.001	0	0.996269	4.58258e-05	6.12699	0.049108	6.07872	6.1769	3	sb = 0
1000000	2000	0.00562	0	0.01	0	0.99465	0.000103645	1.72282	0.0066883	1.71688	1.73006	3	sb = 0
1000000	2000	0.00562	0.01	1e-05	0.01	2.03491	0.078015	23.501	1.07813	22.4028	24.5578	3	sb = 0.01
1000000	2000	0.00562	0.01	1e-05	0.05	263242	91093.8	57.6376	1.23254	56.474	58.9291	3	sb = 0.05
1000000	2000	0.00562	0.01	0.0001	0.01	2.12252	0.043548	22.8227	2.04986	21.2813	25.149	3	sb = 0.01
1000000	2000	0.00562	0.01	0.0001	0.05	758942	882260	60.1419	3.30081	56.6028	63.1368	3	sb = 0.05
1000000	2000	0.00562	0.01	0.001	0.01	2.11681	0.180287	20.785	3.76353	17.0687	24.594	3	sb = 0.01
1000000	2000	0.00562	0.01	0.001	0.05	239775	75950	60.2096	5.58692	55.4324	66.3528	3	sb = 0.05
1000000	2000	0.00562	0.01	0.01	0.01	2.14585	0.11647	17.0335	1.86409	14.9109	18.4042	3	sb = 0.01
1000000	2000	0.00562	0.01	0.01	0.05	252049	97701.4	57.4019	5.23734	51.3967	61.0232	3	sb = 0.05
1000000	2000	0.00562	0.1	1e-05	0.01	4.05278	0.519888	35.9626	4.74993	31.1892	40.6887	3	sb = 0.01
1000000	2000	0.00562	0.1	1e-05	0.05	1.09638e+10	7.75694e+09	96.2246	3.94595	92.5649	100.405	3	sb = 0.05
1000000	2000	0.00562	0.1	0.0001	0.01	4.51848	0.280362	37.433	2.43435	34.7937	39.5903	3	sb = 0.01
1000000	2000	0.00562	0.1	0.0001	0.05	1.38898e+10	1.05223e+10	95.8964	4.18294	92.5321	100.58	3	sb = 0.05
1000000	2000	0.00562	0.1	0.001	0.01	4.31938	0.231272	39.6789	3.42215	36.2805	43.1243	3	sb = 0.01
1000000	2000	0.00562	0.1	0.001	0.05	7.03895e+09	5.28217e+09	94.386	0.72598	93.5523	94.8789	3	sb = 0.05
1000000	2000	0.00562	0.1	0.01	0.01	4.63042	0.358935	33.3103	4.14468	28.7119	36.7581	3	sb = 0.01
1000000	2000	0.00562	0.1	0.01	0.05	8.61659e+09	3.07997e+09	95.3114	1.67643	94.204	97.2401	3	sb = 0.05
1000000	2000	0.01	0	1e-05	0	0.999804	2e-06	19.7514	0.102174	19.6366	19.8325	3	sb = 0
1000000	2000	0.01	0	0.0001	0	0.998329	2.3e-05	18.3363	0.187319	18.1539	18.5282	3	sb = 0
1000000	2000	0.01	0	0.001	0	0.993248	0.000154111	11.2024	0.111851	11.1085	11.3262	3	sb = 0
1000000	2000	0.01	0	0.01	0	0.990649	9.70429e-05	3.0103	0.0435472	2.96013	3.03836	3	sb = 0
1000000	2000	0.01	0.01	1e-05	0.01	2.63445	0.292033	36.2508	3.86283	31.9976	39.5411	3	sb = 0.01
1000000	2000	0.01	0.01	1e-05	0.05	4.22108e+06	2.7934e+06	79.305	6.29745	72.43	84.7941	3	sb = 0.05
1000000	2000	0.01	0.01	0.0001	0.01	2.72868	0.188045	35.4359	5.19507	29.4371	38.4562	3	sb = 0.01
1000000	2000	0.01	0.01	0.0001	0.05	1.44485e+06	630609	68.7248	5.42729	62.5554	72.7632	3	sb = 0.05
1000000	2000	0.01	0.01	0.001	0.01	2.30088	0.0862271	34.5913	1.80702	32.5298	35.9015	3	sb = 0.01
1000000	2000	0.01	0.01	0.001	0.05	2.49114e+06	2.0629e+06	73.995	3.07136	70.6838	76.7506	3	sb = 0.05
1000000	2000	0.01	0.01	0.01	0.01	2.40426	0.257316	22.8565	2.63833	20.09	25.3446	3	sb = 0.01
1000000	2000	0.01	0.01	0.01	0.05	1.67218e+06	749614	70.762	5.03109	66.6217	76.3613	3	sb = 0.05
1000000	2000	0.01	0.1	1e-05	0.01	5.29054	0.479194	50.358	6.27191	44.4261	56.922	3	sb = 0.01
1000000	2000	0.01	0.1	1e-05	0.05	9.04279e+11	1.21586e+12	120.641	2.57832	118.237	123.364	3	sb = 0.05
1000000	2000	0.01	0.1	0.0001	0.01	5.50554	0.748769	51.9805	3.30912	48.7001	55.3176	3	sb = 0.01
1000000	2000	0.01	0.1	0.0001	0.05	2.30221e+11	2.10507e+11	125.876	6.17764	118.753	129.777	3	sb = 0.05
1000000	2000	0.01	0.1	0.001	0.01	6.27011	0.378966	50.4637	4.59307	45.1606	53.1817	3	sb = 0.01
1000000	2000	0.01	0.1	0.001	0.05	1.11766e+12	8.48223e+10	128.633	4.26615	124.051	132.491	3	sb = 0.05
1000000	2000	0.01	0.1	0.01	0.01	5.19187	0.14257	41.8899	2.98571	38.5097	44.1676	3	sb = 0.01
1000000	2000	0.01	0.1	0.01	0.05	4.04334e+11	3.57108e+11	119.534	4.66731	116.458	124.905	3	sb = 0.05
1000000	2000	0.01778	0	1e-05	0	0.99965	1.52753e-06	35.0985	0.198595	34.894	35.2906	3	sb = 0
1000000	2000	0.01778	0	0.0001	0	0.99704	3.02875e-05	32.4039	0.139526	32.256	32.5332	3	sb = 0
1000000	2000	0.01778	0	0.001	0	0.988539	0.000277923	19.0581	0.705692	18.2435	19.4846	3	sb = 0
1000000	2000	0.01778	0	0.01	0	0.983369	7.13583e-05	5.60118	0.142562	5.44101	5.71418	3	sb = 0
1000000	2000	0.01778	0.01	1e-05	0.01	2.712	0.142533	55.0556	0.51262	54.6038	55.6127	3	sb = 0.01
1000000	2000	0.01778	0.01	1e-05	0.05	2.78812e+07	2.24662e+07	102.247	11.872	89.0784	112.131	3	sb = 0.05
1000000	2000	0.01778	0.01	0.0001	0.01	2.76718	0.107328	48.6728	7.49927	41.0245	56.0136	3	sb = 0.01
1000000	2000	0.01778	0.01	0.0001	0.05	9.0103e+06	2.77784e+06	99.6464	10.6563	92.6704	111.913	3	sb = 0.05
1000000	2000	0.01778	0.01	0.001	0.01	2.51791	0.116048	51.7769	7.20714	43.8182	57.8626	3	sb = 0.01
1000000	2000	0.01778	0.01	0.001	0.05	2.62357e+07	4.01936e+06	90.8871	3.71707	86.6358	93.5245	3	sb = 0.05
1000000	2000	0.01778	0.01	0.01	0.01	2.64438	0.530404	31.404	3.94422	28.0965	35.7692	3	sb = 0.01
1000000	2000	0.01778	0.01	0.01	0.05	4.05733e+07	3.45026e+07	90.8864	10.2396	83.4751	102.57	3	sb = 0.05
1000000	2000	0.01778	0.1	1e-05	0.01	8.4773	0.899239	79.0443	10.9541	67.0527	88.525	3	sb = 0.01
1000000	2000	0.01778	0.1	1e-05	0.05	7.75366e+13	40459110096932	160.872	6.35327	154.06	166.637	3	sb = 0.05
1000000	2000	0.01778	0.1	0.0001	0.01	7.71767	0.438394	71.1065	2.80827	68.427	74.0279	3	sb = 0.01
1000000	2000	0.01778	0.1	0.0001	0.05	160486559656307	76163239132314	165.847	2.13881	163.379	167.147	3	sb = 0.05
1000000	2000	0.01778	0.1	0.001	0.01	7.57892	0.571756	68.7801	5.28366	63.7575	74.291	3	sb = 0.01
1000000	2000	0.01778	0.1	0.001	0.05	126924127408666	6.86911e+13	167.409	7.98942	159.405	175.384	3	sb = 0.05
1000000	2000	0.01778	0.1	0.01	0.01	8.4516	0.380429	68.1619	4.61633	65.1101	73.4727	3	sb = 0.01
1000000	2000	0.01778	0.1	0.01	0.05	6.32143e+13	2.05518e+13	153.97	3.17318	150.494	156.713	3	sb = 0.05
1000000	2000	0.03162	0	1e-05	0	0.99938	1.1547e-06	62.5358	0.102369	62.4486	62.6486	3	sb = 0
1000000	2000	0.03162	0	0.0001	0	0.994751	3.30454e-05	57.5738	0.185059	57.366	57.7208	3	sb = 0
1000000	2000	0.03162	0	0.001	0	0.978308	0.000704696	35.3319	1.01476	34.2804	36.3055	3	sb = 0
1000000	2000	0.03162	0	0.01	0	0.970281	0.000523506	10.0589	0.286074	9.7999	10.3659	3	sb = 0
1000000	2000	0.03162	0.01	1e-05	0.01	3.73279	0.399012	80.4293	1.84012	79.1146	82.5322	3	sb = 0.01
1000000	2000	0.03162	0.01	1e-05	0.05	7.12927e+08	3.38055e+08	140.752	10.6941	128.98	149.867	3	sb = 0.05
1000000	2000	0.03162	0.01	0.0001	0.01	3.47134	0.314285	82.8817	8.59	77.8782	92.8004	3	sb = 0.01
1000000	2000	0.03162	0.01	0.0001	0.05	5.08343e+08	3.82438e+08	138.923	12.2475	125.219	148.802	3	sb = 0.05
1000000	2000	0.03162	0.01	0.001	0.01	3.02508	0.196878	80.7578	13.2144	67.5221	93.9507	3	sb = 0.01
1000000	2000	0.03162	0.01	0.001	0.05	4.94726e+08	6.00287e+08	129.354	11.4852	116.133	136.868	3	sb = 0.05
1000000	2000	0.03162	0.01	0.01	0.01	2.8936	0.33732	46.3494	0.44535	45.8378	46.6502	3	sb = 0.01
1000000	2000	0.03162	0.01	0.01	0.05	2.45999e+08	6.89066e+07	106.036	2.77249	103.445	108.96	3	sb = 0.05
1000000	2000	0.03162	0.1	1e-05	0.01	13.3297	0.998134	111.559	12.1688	104.404	125.609	3	sb = 0.01
1000000	2000	0.03162	0.1	1e-05	0.05	2.24222e+16	1.24171e+16	218.693	6.47331	213.021	225.745	3	sb = 0.05	X
1000000	2000	0.03162	0.1	0.0001	0.01	14.6331	2.86641	119.792	3.20296	116.148	122.163	3	sb = 0.01
1000000	2000	0.03162	0.1	0.0001	0.05	1.55847e+16	1.33688e+16	213.642	7.52854	209.25	222.335	3	sb = 0.05	X
1000000	2000	0.03162	0.1	0.001	0.01	12.9939	1.23808	113.791	3.74798	109.871	117.339	3	sb = 0.01
1000000	2000	0.03162	0.1	0.001	0.05	2.38206e+16	1.15838e+16	222.025	6.89238	216.193	229.631	3	sb = 0.05	X
1000000	2000	0.03162	0.1	0.01	0.01	11.3995	0.778891	88.1294	6.96942	80.6077	94.3683	3	sb = 0.01
1000000	2000	0.03162	0.1	0.01	0.05	1.03693e+16	1257832530556880	201.47	6.21448	194.859	207.193	3	sb = 0.05	X
1000000	2000	0.05623	0	1e-05	0	0.998897	5e-06	111.427	0.51279	110.848	111.825	3	sb = 0
1000000	2000	0.05623	0	0.0001	0	0.990636	4.40946e-05	102.644	0.308107	102.399	102.99	3	sb = 0
1000000	2000	0.05623	0	0.001	0	0.960785	0.00150571	65.4349	3.76556	61.0983	67.8761	3	sb = 0
1000000	2000	0.05623	0	0.01	0	0.947538	0.00295907	18.1001	2.46806	15.2512	19.5878	3	sb = 0
1000000	2000	0.05623	0.01	1e-05	0.01	4.03858	0.349463	159.411	8.00368	154.11	168.618	3	sb = 0.01
1000000	2000	0.05623	0.01	1e-05	0.05	7.01667e+09	3.45839e+09	201.779	9.98344	194.507	213.161	3	sb = 0.05	X
1000000	2000	0.05623	0.01	0.0001	0.01	4.65584	0.135844	139.716	14.547	126.738	155.441	3	sb = 0.01
1000000	2000	0.05623	0.01	0.0001	0.05	2.34473e+10	2.26343e+10	208.014	1.16718	206.703	208.942	3	sb = 0.05	X
1000000	2000	0.05623	0.01	0.001	0.01	4.07117	0.239933	120.716	5.083	116.228	126.236	3	sb = 0.01
1000000	2000	0.05623	0.01	0.001	0.05	1.32025e+10	6.50016e+09	201.741	6.87237	195.464	209.084	3	sb = 0.05	X
1000000	2000	0.05623	0.01	0.01	0.01	2.82697	0.199085	72.2593	6.20126	66.9733	79.0855	3	sb = 0.01
1000000	2000	0.05623	0.01	0.01	0.05	9.00395e+09	1.17495e+10	171.428	5.21715	166.016	176.425	3	sb = 0.05	X
1000000	2000	0.05623	0.1	1e-05	0.01	23.4397	1.61469	190.171	10.625	181.888	202.151	3	sb = 0.01	X
1000000	2000	0.05623	0.1	1e-05	0.05	2.73199e+19	2.76263e+19	308.014	17.8278	287.69	321.011	3	sb = 0.05	X
1000000	2000	0.05623	0.1	0.0001	0.01	23.7497	2.10044	179.42	10.3745	167.582	186.928	3	sb = 0.01	X
1000000	2000	0.05623	0.1	0.0001	0.05	1.74273e+19	4.18681e+18	292.8	14.3595	276.479	303.495	3	sb = 0.05	X
1000000	2000	0.05623	0.1	0.001	0.01	23.0383	1.79395	180.396	11.0607	167.668	187.675	3	sb = 0.01	X
1000000	2000	0.05623	0.1	0.001	0.05	1.55463e+19	1.13104e+19	301.412	7.25463	293.097	306.449	3	sb = 0.05	X
1000000	2000	0.05623	0.1	0.01	0.01	17.7554	1.15397	139.453	10.2672	129.208	149.743	3	sb = 0.01
1000000	2000	0.05623	0.1	0.01	0.05	1.59092e+19	1.5897e+19	300.392	8.32468	290.922	306.554	3	sb = 0.05	X
1000000	2000	0.1	0	1e-05	0	0.998043	5.68624e-06	197.922	0.331414	197.542	198.156	3	sb = 0	X
1000000	2000	0.1	0	0.0001	0	0.983489	6.15386e-05	182.05	0.303986	181.728	182.331	3	sb = 0	X
1000000	2000	0.1	0	0.001	0	0.925041	0.00123021	124.877	3.97942	120.285	127.307	3	sb = 0
1000000	2000	0.1	0	0.01	0	0.888211	0.00174568	44.6999	1.5455	42.9317	45.7929	3	sb = 0
1000000	2000	0.1	0.01	1e-05	0.01	5.58104	0.390984	243.563	7.65317	235.087	249.966	3	sb = 0.01	X
1000000	2000	0.1	0.01	1e-05	0.05	5.38039e+11	4.0589e+11	305.748	6.43584	298.362	310.153	3	sb = 0.05	X
1000000	2000	0.1	0.01	0.0001	0.01	5.75731	0.407607	236.351	15.9636	222.826	253.96	3	sb = 0.01	X
1000000	2000	0.1	0.01	0.0001	0.05	4.43579e+11	8.10523e+10	299.458	16.7908	282.587	316.167	3	sb = 0.05	X
1000000	2000	0.1	0.01	0.001	0.01	5.08314	0.388921	217.816	9.04105	211.733	228.205	3	sb = 0.01	X
1000000	2000	0.1	0.01	0.001	0.05	3.24237e+11	1.85275e+11	291.883	12.5728	277.974	302.44	3	sb = 0.05	X
1000000	2000	0.1	0.01	0.01	0.01	2.89278	0.185912	114.79	14.0962	99.9083	127.941	3	sb = 0.01
1000000	2000	0.1	0.01	0.01	0.05	1.70215e+11	4.12348e+10	252.251	7.97771	244.92	260.747	3	sb = 0.05	X
1000000	2000	0.1	0.1	1e-05	0.01	59.1818	13.5396	283.358	18.8274	266.516	303.684	3	sb = 0.01	X
1000000	2000	0.1	0.1	1e-05	0.05	9.81804e+22	2.78936e+22	434.932	19.4718	413.666	451.886	3	sb = 0.05	X
1000000	2000	0.1	0.1	0.0001	0.01	51.9632	5.98404	283.331	14.8716	272.465	300.279	3	sb = 0.01	X
1000000	2000	0.1	0.1	0.0001	0.05	1.41967e+23	8.23998e+22	451.822	3.3801	449.339	455.671	3	sb = 0.05	X
1000000	2000	0.1	0.1	0.001	0.01	50.5955	8.20674	283.742	6.00972	276.988	288.5	3	sb = 0.01	X
1000000	2000	0.1	0.1	0.001	0.05	2.43964e+23	3.58536e+23	432.816	19.0804	417.568	454.213	3	sb = 0.05	X
1000000	2000	0.1	0.1	0.01	0.01	26.0316	4.45882	190.007	12.5681	175.816	199.731	3	sb = 0.01	X
1000000	2000	0.1	0.1	0.01	0.05	4.13037e+22	4.0324e+22	401.869	4.18783	397.121	405.036	3	sb = 0.05	X
1000000	2000	0.17783	0	1e-05	0	0.996519	8e-06	352.06	0.80608	351.142	352.65	3	sb = 0	X
1000000	2000	0.17783	0	0.0001	0	0.970974	0.000205724	322.362	2.02873	320.043	323.809	3	sb = 0	X
1000000	2000	0.17783	0	0.001	0	0.859491	0.00613199	233.548	10.3552	226.037	245.361	3	sb = 0	X
1000000	2000	0.17783	0	0.01	0	0.737425	0.00212731	96.2745	5.55632	90.7537	101.866	3	sb = 0
1000000	2000	0.17783	0.01	1e-05	0.01	8.0983	1.20299	395.437	17.9972	374.867	408.279	3	sb = 0.01	X
1000000	2000	0.17783	0.01	1e-05	0.05	8.68354e+13	8.54057e+13	479.573	12.0363	472.176	493.461	3	sb = 0.05	X
1000000	2000	0.17783	0.01	0.0001	0.01	8.76649	0.27258	399.652	16.133	381.777	413.133	3	sb = 0.01	X
1000000	2000	0.17783	0.01	0.0001	0.05	2.7102e+13	5.71268e+12	476.564	16.2002	466.251	495.236	3	sb = 0.05	X
1000000	2000	0.17783	0.01	0.001	0.01	6.12557	0.292418	361.972	32.5555	336.242	398.572	3	sb = 0.01	X
1000000	2000	0.17783	0.01	0.001	0.05	5.26998e+13	60931865533447	470.775	10.8861	459.852	481.624	3	sb = 0.05	X
1000000	2000	0.17783	0.01	0.01	0.01	2.79137	0.0484306	203.599	7.01514	198.87	211.659	3	sb = 0.01	X
1000000	2000	0.17783	0.01	0.01	0.05	1.93596e+12	1.22094e+12	394.545	9.20507	383.919	400.059	3	sb = 0.05	X
1000000	2000	0.17783	0.1	1e-05	0.01	203.615	56.7473	474.342	5.71789	470.422	480.903	3	sb = 0.01	X
1000000	2000	0.17783	0.1	1e-05	0.05	2.27173e+28	1.33574e+28	662.384	25.3785	633.639	681.692	3	sb = 0.05
1000000	2000	0.17783	0.1	0.0001	0.01	161.105	4.92898	471.155	28.8083	450.438	504.053	3	sb = 0.01	X
1000000	2000	0.17783	0.1	0.0001	0.05	1.59356e+28	7.1301e+27	661.499	7.07001	656.619	669.607	3	sb = 0.05
1000000	2000	0.17783	0.1	0.001	0.01	146.582	24.7112	459.606	26.7997	430.61	483.466	3	sb = 0.01	X
1000000	2000	0.17783	0.1	0.001	0.05	9.73873e+27	7.83911e+27	653.178	8.64259	647.181	663.084	3	sb = 0.05
1000000	2000	0.17783	0.1	0.01	0.01	46.6743	6.58427	329.735	21.9802	305.822	349.058	3	sb = 0.01	X
1000000	2000	0.17783	0.1	0.01	0.05	6.61785e+27	5.14756e+27	617.561	30.3328	594.374	651.889	3	sb = 0.05	X
1000000	2000	0.31623	0	1e-05	0	0.993823	6.1101e-06	626.163	0.828784	625.674	627.12	3	sb = 0	X
1000000	2000	0.31623	0	0.0001	0	0.948208	0.000320706	578.338	2.08397	576.256	580.424	3	sb = 0	X
1000000	2000	0.31623	0	0.001	0	0.732018	0.00126854	439.468	4.03293	437.036	444.123	3	sb = 0	X
1000000	2000	0.31623	0	0.01	0	0.45049	0.0128888	218.091	5.54735	212.653	223.742	3	sb = 0	X
1000000	2000	0.31623	0.01	1e-05	0.01	13.4118	1.68784	690.274	12.0289	676.889	700.18	3	sb = 0.01
1000000	2000	0.31623	0.01	1e-05	0.05	3.82663e+16	4.5468e+16	784.371	28.6103	753.932	810.711	3	sb = 0.05
1000000	2000	0.31623	0.01	0.0001	0.01	13.5412	0.94975	659.613	40.161	628.066	704.823	3	sb = 0.01
1000000	2000	0.31623	0.01	0.0001	0.05	1.13487e+16	8351578061500570	770.413	13.4374	756.697	783.553	3	sb = 0.05
1000000	2000	0.31623	0.01	0.001	0.01	7.22191	0.253411	626.306	21.6537	607.839	650.138	3	sb = 0.01	X
1000000	2000	0.31623	0.01	0.001	0.05	8093717262776610	5187046959356630	763.053	14.9891	750.492	779.645	3	sb = 0.05
1000000	2000	0.31623	0.01	0.01	0.01	1.57051	0.201937	355.849	16.9748	336.31	366.965	3	sb = 0.01	X
1000000	2000	0.31623	0.01	0.01	0.05	120803131533084	6.39508e+13	636.592	10.2463	625.604	645.885	3	sb = 0.05	X
1000000	2000	0.31623	0.1	1e-05	0.01	885.021	167.299	782.564	14.6978	765.662	792.346	3	sb = 0.01
1000000	2000	0.31623	0.1	1e-05	0.05	1.30285e+35	1.23375e+35	1042.53	14.8401	1028.27	1057.89	3	sb = 0.05
1000000	2000	0.31623	0.1	0.0001	0.01	774.111	76.4041	798.036	30.3455	777.361	832.873	3	sb = 0.01
1000000	2000	0.31623	0.1	0.0001	0.05	1.30334e+35	5.26259e+34	1033.61	26.1116	1005	1056.15	3	sb = 0.05
1000000	2000	0.31623	0.1	0.001	0.01	458.447	28.2937	765.197	10.9267	753.852	775.651	3	sb = 0.01
1000000	2000	0.31623	0.1	0.001	0.05	7.04899e+34	4.96574e+33	1020.38	14.6342	1011.66	1037.28	3	sb = 0.05
1000000	2000	0.31623	0.1	0.01	0.01	70.9057	14.3162	527.543	16.8022	508.606	540.665	3	sb = 0.01	X
1000000	2000	0.31623	0.1	0.01	0.05	7.9722e+32	6.9272e+32	928.773	9.11946	918.244	934.138	3	sb = 0.05
1000000	2000	0.56234	0	1e-05	0	0.989031	1.06927e-05	1113.71	0.525314	1113.35	1114.31	3	sb = 0
1000000	2000	0.56234	0	0.0001	0	0.911911	0.00348555	1012.95	32.3622	975.964	1036.05	3	sb = 0
1000000	2000	0.56234	0	0.001	0	0.539984	0.00629688	833.743	17.7809	820.433	853.936	3	sb = 0
1000000	2000	0.56234	0	0.01	0	0.130895	0.00937076	480.768	0.221829	480.516	480.933	3	sb = 0	X
1000000	2000	0.56234	0.01	1e-05	0.01	27.0498	2.89183	1215.52	17.5946	1195.5	1228.53	3	sb = 0.01
1000000	2000	0.56234	0.01	1e-05	0.05	2.07917e+19	1.30728e+19	1319.69	39.645	1275.67	1352.59	3	sb = 0.05
1000000	2000	0.56234	0.01	0.0001	0.01	20.7462	2.05087	1182.57	8.74035	1173.08	1190.29	3	sb = 0.01
1000000	2000	0.56234	0.01	0.0001	0.05	3.35118e+19	2.13422e+19	1335.02	30.7885	1315.18	1370.49	3	sb = 0.05
1000000	2000	0.56234	0.01	0.001	0.01	11.6386	0.989064	1124.9	14.7142	1115.82	1141.88	3	sb = 0.01
1000000	2000	0.56234	0.01	0.001	0.05	1.10387e+19	6.92682e+18	1275.32	17.2268	1255.48	1286.55	3	sb = 0.05
1000000	2000	0.56234	0.01	0.01	0.01	0.403311	0.0360191	627.196	1.27732	625.826	628.354	3	sb = 0.01	X
1000000	2000	0.56234	0.01	0.01	0.05	1.31035e+16	5389506771929700	1074.77	48.1495	1034.91	1128.27	3	sb = 0.05
1000000	2000	0.56234	0.1	1e-05	0.01	8322.41	1509.53	1376.23	49.2951	1344.96	1433.06	3	sb = 0.01
1000000	2000	0.56234	0.1	1e-05	0.05	8.57576e+43	3.66608e+43	1690.16	28.2669	1665.89	1721.2	3	sb = 0.05
1000000	2000	0.56234	0.1	0.0001	0.01	7911.14	2643.23	1340.34	18.8658	1321.37	1359.1	3	sb = 0.01
1000000	2000	0.56234	0.1	0.0001	0.05	1.03806e+44	1.08005e+44	1639.84	44.6819	1603.68	1689.79	3	sb = 0.05
1000000	2000	0.56234	0.1	0.001	0.01	3397.09	779.844	1301.87	42.032	1253.38	1327.78	3	sb = 0.01
1000000	2000	0.56234	0.1	0.001	0.05	5.02503e+43	2.5028e+43	1633.08	71.7707	1550.21	1674.88	3	sb = 0.05
1000000	2000	0.56234	0.1	0.01	0.01	76.472	8.29189	882.698	27.1213	852.196	904.096	3	sb = 0.01
1000000	2000	0.56234	0.1	0.01	0.05	6.76056e+40	6.70934e+40	1468.02	52.2985	1407.67	1499.94	3	sb = 0.05
1000000	2000	1	0	1e-05	0	0.980576	1.9218e-05	1979.79	1.08381	1978.55	1980.5	3	sb = 0
1000000	2000	1	0	0.0001	0	0.841815	0.00124438	1857.29	4.99194	1853.36	1862.91	3	sb = 0
1000000	2000	1	0	0.001	0	0.298754	0.00209613	1559.82	12.0981	1545.98	1568.41	3	sb = 0
1000000	2000	1	0	0.01	0	0.006413	0.000640572	984.053	11.376	971.987	994.583	3	sb = 0
1000000	2000	1	0.01	1e-05	0.01	51.4578	5.47697	2102.21	75.5132	2015.78	2155.42	3	sb = 0.01
1000000	2000	1	0.01	1e-05	0.05	4.84737e+23	5.97335e+23	2232.44	21.5797	2217.99	2257.25	3	sb = 0.05
1000000	2000	1	0.01	0.0001	0.01	50.0047	3.24819	2063.93	67.0572	1995.36	2129.36	3	sb = 0.01
1000000	2000	1	0.01	0.0001	0.05	1.94897e+23	1.29217e+23	2303	26.2734	2272.67	2318.69	3	sb = 0.05
1000000	2000	1	0.01	0.001	0.01	9.71166	1.31657	1872.19	34.1075	1835.3	1902.57	3	sb = 0.01
1000000	2000	1	0.01	0.001	0.05	5.8419e+22	5.58583e+22	2168.53	15.6647	2156	2186.09	3	sb = 0.05
1000000	2000	1	0.01	0.01	0.01	0.0205847	0.00121507	1102.82	16.756	1086.97	1120.35	3	sb = 0.01
1000000	2000	1	0.01	0.01	0.05	1.84218e+17	2.74025e+17	1770.99	12.0437	1763.03	1784.85	3	sb = 0.05
1000000	2000	1	0.1	1e-05	0.01	207299	30538.7	2356.97	39.0658	2313.28	2388.55	3	sb = 0.01
1000000	2000	1	0.1	1e-05	0.05	1.63907e+56	9.53725e+55	2759.14	50.0378	2725.92	2816.69	3	sb = 0.05
1000000	2000	1	0.1	0.0001	0.01	190819	70520.6	2323.55	83.4934	2232.06	2395.63	3	sb = 0.01
1000000	2000	1	0.1	0.0001	0.05	3.66168e+56	1.77033e+56	2756.67	22.4828	2736.51	2780.91	3	sb = 0.05
1000000	2000	1	0.1	0.001	0.01	36103	8763.57	2230.41	17.5855	2217.52	2250.44	3	sb = 0.01
1000000	2000	1	0.1	0.001	0.05	2.13701e+56	2.31482e+56	2709.23	54.516	2666.43	2770.61	3	sb = 0.05
1000000	2000	1	0.1	0.01	0.01	25.9749	7.43979	1543.07	10.6901	1532.55	1553.93	3	sb = 0.01
1000000	2000	1	0.1	0.01	0.05	2.60556e+50	1.78184e+50	2428.17	41.0466	2380.82	2453.7	3	sb = 0.05
1000000	1000	0.001	0.01	1e-05	1e-05	0.99999	5.7735e-07	0.985195	0.0234073	0.963806	1.0102	3	sb = -sd
1000000	1000	0.001	0.01	1e-05	0.0001	0.999991	1e-06	1.01775	0.0159085	1.0051	1.03561	3	sb = -10sd
1000000	1000	0.001	0.01	0.0001	0.0001	0.999911	4.16333e-06	0.949363	0.0205231	0.928672	0.969714	3	sb = -sd
1000000	1000	0.001	0.01	0.0001	0.001	0.999966	3.073e-05	0.985274	0.0306007	0.950432	1.00779	3	sb = -10sd
1000000	1000	0.001	0.01	0.001	0.001	0.999574	4.90034e-05	0.701552	0.0168487	0.684466	0.718153	3	sb = -sd
1000000	1000	0.001	0.01	0.001	0.01	1.20135	0.0350379	4.09987	0.42574	3.60949	4.37505	3	sb = -10sd
1000000	1000	0.001	0.01	0.01	0.01	1.18447	0.0353635	3.51197	0.420781	3.20153	3.99089	3	sb = -sd
1000000	1000	0.001	0.01	0.01	0.1	113019	144594	27.2297	0.489345	26.8703	27.787	3	sb = -10sd
1000000	1000	0.001	0.1	1e-05	1e-05	0.999992	0	1.00562	0.0205181	0.983264	1.02359	3	sb = -sd
1000000	1000	0.001	0.1	1e-05	0.0001	1	2e-06	1.02226	0.0167691	1.0044	1.03767	3	sb = -10sd
1000000	1000	0.001	0.1	0.0001	0.0001	0.99993	1.52753e-06	0.955767	0.0262927	0.925443	0.972212	3	sb = -sd
1000000	1000	0.001	0.1	0.0001	0.001	1.00073	0.000300446	1.15838	0.0629764	1.09564	1.22159	3	sb = -10sd
1000000	1000	0.001	0.1	0.001	0.001	1.00016	0.000137202	0.917796	0.054222	0.862596	0.970984	3	sb = -sd
1000000	1000	0.001	0.1	0.001	0.01	1.46861	0.0665424	7.16752	0.283786	6.91179	7.47283	3	sb = -10sd
1000000	1000	0.001	0.1	0.01	0.01	1.56079	0.0511336	7.65795	0.612304	7.13464	8.33134	3	sb = -sd
1000000	1000	0.001	0.1	0.01	0.1	7.63384e+08	7.52232e+08	47.0144	3.7992	43.1138	50.7034	3	sb = -10sd
1000000	1000	0.00178	0.01	1e-05	1e-05	0.999983	0	1.75591	0.0103609	1.74672	1.76714	3	sb = -sd
1000000	1000	0.00178	0.01	1e-05	0.0001	0.999984	5.7735e-07	1.7864	0.0140392	1.77198	1.80002	3	sb = -10sd
1000000	1000	0.00178	0.01	0.0001	0.0001	0.99984	1.52753e-06	1.70163	0.0175485	1.68338	1.71838	3	sb = -sd
1000000	1000	0.00178	0.01	0.0001	0.001	1.00003	0.000203227	1.75714	0.0189419	1.74167	1.77827	3	sb = -10sd
1000000	1000	0.00178	0.01	0.001	0.001	0.999232	6.3264e-05	1.25507	0.0306973	1.2367	1.29051	3	sb = -sd
1000000	1000	0.00178	0.01	0.001	0.01	1.29644	0.0253179	5.42794	0.440004	4.98523	5.86519	3	sb = -10sd
1000000	1000	0.00178	0.01	0.01	0.01	1.31745	0.0380759	5.34122	0.846857	4.45017	6.13558	3	sb = -sd
1000000	1000	0.00178	0.01	0.01	0.1	1.94879e+06	1.15632e+06	34.6729	0.553069	34.0363	35.0355	3	sb = -10sd
1000000	1000	0.00178	0.1	1e-05	1e-05	0.999986	5.7735e-07	1.7683	0.0067467	1.76373	1.77605	3	sb = -sd
1000000	1000	0.00178	0.1	1e-05	0.0001	1	5.7735e-07	1.81587	0.0396929	1.77096	1.84623	3	sb = -10sd
1000000	1000	0.00178	0.1	0.0001	0.0001	0.999872	1e-06	1.7388	0.0412422	1.69665	1.77907	3	sb = -sd
1000000	1000	0.00178	0.1	0.0001	0.001	1.00102	0.000397848	2.03137	0.0684201	1.98828	2.11026	3	sb = -10sd
1000000	1000	0.00178	0.1	0.001	0.001	1.00049	0.000515412	1.56949	0.0444187	1.53357	1.61915	3	sb = -sd
1000000	1000	0.00178	0.1	0.001	0.01	1.59394	0.0566272	10.7605	1.89602	8.63766	12.2857	3	sb = -10sd
1000000	1000	0.00178	0.1	0.01	0.01	1.57202	0.0573148	8.69212	0.712353	7.9436	9.36173	3	sb = -sd
1000000	1000	0.00178	0.1	0.01	0.1	2.74794e+10	2.20312e+10	52.5149	4.30427	48.5747	57.1085	3	sb = -10sd
1000000	1000	0.00316	0.01	1e-05	1e-05	0.999969	1e-06	3.16491	0.0477856	3.1221	3.21646	3	sb = -sd
1000000	1000	0.00316	0.01	1e-05	0.0001	0.999972	5.7735e-07	3.18262	0.0170289	3.16395	3.1973	3	sb = -10sd
1000000	1000	0.00316	0.01	0.0001	0.0001	0.999719	6.02771e-06	3.02551	0.0293081	2.99252	3.04855	3	sb = -sd
1000000	1000	0.00316	0.01	0.0001	0.001	0.999895	5.0856e-05	3.0439	0.0431396	2.99629	3.08039	3	sb = -10sd
1000000	1000	0.00316	0.01	0.001	0.001	0.998767	0.000354983	2.26648	0.088082	2.20972	2.36795	3	sb = -sd
1000000	1000	0.00316	0.01	0.001	0.01	1.39678	0.0661376	8.96015	1.16162	8.21362	10.2985	3	sb = -10sd
1000000	1000	0.00316	0.01	0.01	0.01	1.35793	0.0193026	6.14094	1.28754	5.38617	7.6276	3	sb = -sd
1000000	1000	0.00316	0.01	0.01	0.1	3.40103e+06	549536	35.9515	2.85771	33.096	38.8115	3	sb = -10sd
1000000	1000	0.00316	0.1	1e-05	1e-05	0.999974	5.7735e-07	3.14958	0.0180436	3.13194	3.168	3	sb = -sd
1000000	1000	0.00316	0.1	1e-05	0.0001	1.00001	1.73205e-06	3.19859	0.0227045	3.17343	3.21754	3	sb = -10sd
1000000	1000	0.00316	0.1	0.0001	0.0001	0.999776	4.93288e-06	3.07455	0.0407626	3.04008	3.11954	3	sb = -sd
1000000	1000	0.00316	0.1	0.0001	0.001	1.0017	0.0004	3.52977	0.0413137	3.48731	3.56983	3	sb = -10sd
1000000	1000	0.00316	0.1	0.001	0.001	1.00071	0.000534326	2.80873	0.0550813	2.74855	2.85665	3	sb = -sd
1000000	1000	0.00316	0.1	0.001	0.01	1.6778	0.0502555	11.5839	0.46069	11.1348	12.0553	3	sb = -10sd
1000000	1000	0.00316	0.1	0.01	0.01	1.72973	0.0271215	9.32286	0.669007	8.68271	10.0174	3	sb = -sd
1000000	1000	0.00316	0.1	0.01	0.1	7.58361e+11	7.01148e+11	64.9553	2.00433	62.6409	66.1126	3	sb = -10sd
1000000	1000	0.00562	0.01	1e-05	1e-05	0.999946	1.52753e-06	5.54494	0.0567479	5.49233	5.60507	3	sb = -sd
1000000	1000	0.00562	0.01	1e-05	0.0001	0.99995	0	5.61651	0.0391791	5.57986	5.6578	3	sb = -10sd
1000000	1000	0.00562	0.01	0.0001	0.0001	0.999507	5.85947e-06	5.29232	0.00856267	5.28245	5.29783	3	sb = -sd
1000000	1000	0.00562	0.01	0.0001	0.001	0.999747	2.81603e-05	5.49801	0.0920216	5.43678	5.60383	3	sb = -10sd
1000000	1000	0.00562	0.01	0.001	0.001	0.997523	0.000104862	3.98317	0.0481707	3.92851	4.01945	3	sb = -sd
1000000	1000	0.00562	0.01	0.001	0.01	1.45396	0.082897	9.72222	0.612259	9.35859	10.4291	3	sb = -10sd
1000000	1000	0.00562	0.01	0.01	0.01	1.41156	0.0312036	7.82682	0.583516	7.28821	8.44672	3	sb = -sd
1000000	1000	0.00562	0.01	0.01	0.1	1.0004e+08	1.22385e+07	43.8963	1.93866	42.3692	46.0773	3	sb = -10sd
1000000	1000	0.00562	0.1	1e-05	1e-05	0.999955	1.73205e-06	5.65446	0.0567164	5.59501	5.70797	3	sb = -sd
1000000	1000	0.00562	0.1	1e-05	0.0001	1.00001	2.51661e-06	5.62017	0.0160066	5.60219	5.63288	3	sb = -10sd
1000000	1000	0.00562	0.1	0.0001	0.0001	0.9996	6.02771e-06	5.40595	0.0651975	5.35332	5.47888	3	sb = -sd
1000000	1000	0.00562	0.1	0.0001	0.001	1.00381	0.00104675	6.24338	0.224729	6.10165	6.50249	3	sb = -10sd
1000000	1000	0.00562	0.1	0.001	0.001	1.00145	0.00184099	4.92043	0.184342	4.72904	5.09681	3	sb = -sd
1000000	1000	0.00562	0.1	0.001	0.01	1.99257	0.0729383	21.0165	1.6573	19.8678	22.9164	3	sb = -10sd
1000000	1000	0.00562	0.1	0.01	0.01	2.0938	0.0641247	15.3295	0.897942	14.507	16.2875	3	sb = -sd
1000000	1000	0.00562	0.1	0.01	0.1	117658729716665	6.51642e+13	77.4292	1.71697	76.322	79.4071	3	sb = -10sd
1000000	1000	0.01	0.01	1e-05	1e-05	0.999903	5.7735e-07	9.99919	0.043333	9.94917	10.0251	3	sb = -sd
1000000	1000	0.01	0.01	1e-05	0.0001	0.999916	2.51661e-06	9.96569	0.0478119	9.9185	10.0141	3	sb = -10sd
1000000	1000	0.01	0.01	0.0001	0.0001	0.999125	7e-06	9.48735	0.100037	9.42259	9.60257	3	sb = -sd
1000000	1000	0.01	0.01	0.0001	0.001	0.999646	5.2e-05	9.69826	0.0475214	9.66142	9.7519	3	sb = -10sd
1000000	1000	0.01	0.01	0.001	0.001	0.995651	0.000186433	7.05007	0.105707	6.95892	7.16595	3	sb = -sd
1000000	1000	0.01	0.01	0.001	0.01	1.4823	0.0489935	14.6412	3.32583	10.8053	16.7179	3	sb = -10sd
1000000	1000	0.01	0.01	0.01	0.01	1.5572	0.0799698	10.4117	2.33348	7.75021	12.1066	3	sb = -sd
1000000	1000	0.01	0.01	0.01	0.1	2.60932e+09	2.68737e+09	55.0805	4.76221	51.4998	60.4851	3	sb = -10sd
1000000	1000	0.01	0.1	1e-05	1e-05	0.999921	5.7735e-07	9.9637	0.0353453	9.92466	9.99352	3	sb = -sd
1000000	1000	0.01	0.1	1e-05	0.0001	1.00002	1.1547e-06	9.9901	0.0764792	9.91168	10.0645	3	sb = -10sd
1000000	1000	0.01	0.1	0.0001	0.0001	0.999295	1.15326e-05	9.60281	0.144932	9.43899	9.71434	3	sb = -sd
1000000	1000	0.01	0.1	0.0001	0.001	1.00595	0.00126656	10.9886	0.231695	10.8003	11.2473	3	sb = -10sd
1000000	1000	0.01	0.1	0.001	0.001	1.00084	0.000377501	8.72724	0.242495	8.52635	8.99661	3	sb = -sd
1000000	1000	0.01	0.1	0.001	0.01	2.51331	0.306255	26.5863	5.85066	20.3689	31.9837	3	sb = -10sd
1000000	1000	0.01	0.1	0.01	0.01	2.25773	0.0331836	19.9128	0.515751	19.5645	20.5053	3	sb = -sd
1000000	1000	0.01	0.1	0.01	0.1	1.99879e+16	7174844361404760	90.0597	1.73973	88.6304	91.9969	3	sb = -10sd
1000000	1000	0.01778	0.01	1e-05	1e-05	0.999828	1.73205e-06	17.6955	0.0688229	17.6351	17.7704	3	sb = -sd
1000000	1000	0.01778	0.01	1e-05	0.0001	0.999848	5.7735e-07	17.5674	0.0578785	17.5196	17.6318	3	sb = -10sd
1000000	1000	0.01778	0.01	0.0001	0.0001	0.998426	4.93288e-06	16.9388	0.0520253	16.893	16.9954	3	sb = -sd
1000000	1000	0.01778	0.01	0.0001	0.001	0.999251	0.000133103	17.2471	0.105395	17.1754	17.3681	3	sb = -10sd
1000000	1000	0.01778	0.01	0.001	0.001	0.992142	0.000294809	12.5584	0.115259	12.4673	12.6879	3	sb = -sd
1000000	1000	0.01778	0.01	0.001	0.01	1.52564	0.0489689	21.884	2.66106	19.9883	24.9261	3	sb = -10sd
1000000	1000	0.01778	0.01	0.01	0.01	1.50602	0.0449584	14.3396	1.37852	12.8167	15.5022	3	sb = -sd
1000000	1000	0.01778	0.01	0.01	0.1	3.64102e+10	1.85924e+10	65.9462	2.19362	63.5221	67.7946	3	sb = -10sd
1000000	1000	0.01778	0.1	1e-05	1e-05	0.999859	2.51661e-06	17.6814	0.128738	17.5843	17.8274	3	sb = -sd
1000000	1000	0.01778	0.1	1e-05	0.0001	1.00005	2e-06	17.83	0.16694	17.6372	17.9267	3	sb = -10sd
1000000	1000	0.01778	0.1	0.0001	0.0001	0.998737	1.80093e-05	17.1645	0.0931799	17.0727	17.259	3	sb = -sd
1000000	1000	0.01778	0.1	0.0001	0.001	1.00754	0.000596472	19.1739	0.311653	18.9893	19.5337	3	sb = -10sd
1000000	1000	0.01778	0.1	0.001	0.001	1.00255	0.000725654	14.8519	0.99437	13.7948	15.7686	3	sb = -sd
1000000	1000	0.01778	0.1	0.001	0.01	2.58131	0.0273917	34.9095	2.71681	32.4934	37.8504	3	sb = -10sd
1000000	1000	0.01778	0.1	0.01	0.01	2.77838	0.315984	32.9706	2.65201	30.8806	35.9539	3	sb = -sd
1000000	1000	0.01778	0.1	0.01	0.1	2.66432e+19	2.25468e+19	124.47	7.22451	116.296	129.998	3	sb = -10sd
1000000	1000	0.03162	0.01	1e-05	1e-05	0.999694	1.73205e-06	31.3507	0.13221	31.2348	31.4947	3	sb = -sd
1000000	1000	0.03162	0.01	1e-05	0.0001	0.999722	3.60555e-06	31.6882	0.0505019	31.6398	31.7406	3	sb = -10sd
1000000	1000	0.03162	0.01	0.0001	0.0001	0.997198	2.55799e-05	30.1642	0.140823	30.0727	30.3264	3	sb = -sd
1000000	1000	0.03162	0.01	0.0001	0.001	0.999947	0.0019063	30.7468	0.611688	30.3479	31.451	3	sb = -10sd
1000000	1000	0.03162	0.01	0.001	0.001	0.986342	0.000437863	22.6552	0.249946	22.3802	22.8686	3	sb = -sd
1000000	1000	0.03162	0.01	0.001	0.01	1.75606	0.158853	41.9447	5.24832	37.0574	47.4917	3	sb = -10sd
1000000	1000	0.03162	0.01	0.01	0.01	1.62565	0.066229	21.6534	0.144424	21.4895	21.7621	3	sb = -sd
1000000	1000	0.03162	0.01	0.01	0.1	7.95658e+11	2.63725e+11	88.8118	4.949	83.9713	93.8626	3	sb = -10sd
1000000	1000	0.03162	0.1	1e-05	1e-05	0.999752	1.52753e-06	31.435	0.164189	31.324	31.6236	3	sb = -sd
1000000	1000	0.03162	0.1	1e-05	0.0001	1.00006	2.64575e-06	31.7274	0.0783037	31.6633	31.8147	3	sb = -10sd
1000000	1000	0.03162	0.1	0.0001	0.0001	0.997764	1.34288e-05	30.4638	0.194964	30.281	30.669	3	sb = -sd
1000000	1000	0.03162	0.1	0.0001	0.001	1.01441	0.00282779	33.835	0.972092	32.9069	34.8458	3	sb = -10sd
1000000	1000	0.03162	0.1	0.001	0.001	1.00314	0.00326392	27.4969	1.67129	26.4712	29.4254	3	sb = -sd
1000000	1000	0.03162	0.1	0.001	0.01	3.37298	0.145295	55.8714	4.71809	50.4582	59.1105	3	sb = -10sd
1000000	1000	0.03162	0.1	0.01	0.01	3.02211	0.335959	43.1165	6.10868	37.5372	49.6438	3	sb = -sd
1000000	1000	0.03162	0.1	0.01	0.1	2.83456e+22	2.5906e+22	149.033	10.8652	140.263	161.187	3	sb = -10sd
1000000	1000	0.05623	0.01	1e-05	1e-05	0.999458	1.52753e-06	55.699	0.122242	55.5583	55.7785	3	sb = -sd
1000000	1000	0.05623	0.01	1e-05	0.0001	0.99951	2.64575e-06	56.0532	0.230307	55.8067	56.2628	3	sb = -10sd
1000000	1000	0.05623	0.01	0.0001	0.0001	0.994988	3.15647e-05	53.8784	0.0917258	53.789	53.9723	3	sb = -sd
1000000	1000	0.05623	0.01	0.0001	0.001	0.998613	0.000870715	54.7652	0.519773	54.168	55.1155	3	sb = -10sd
1000000	1000	0.05623	0.01	0.001	0.001	0.976714	0.00133564	39.6418	0.883317	39.0008	40.6494	3	sb = -sd
1000000	1000	0.05623	0.01	0.001	0.01	1.98888	0.0610302	59.8558	8.57444	54.8145	69.7561	3	sb = -10sd
1000000	1000	0.05623	0.01	0.01	0.01	1.63108	0.0538554	33.9218	1.24705	32.9314	35.3222	3	sb = -sd
1000000	1000	0.05623	0.01	0.01	0.1	6.90472e+13	2.70105e+13	114.393	2.66752	111.718	117.053	3	sb = -10sd
1000000	1000	0.05623	0.1	1e-05	1e-05	0.999554	1e-06	56.0011	0.0694312	55.9298	56.0685	3	sb = -sd
1000000	1000	0.05623	0.1	1e-05	0.0001	1.00012	4.50925e-06	56.361	0.153079	56.256	56.5366	3	sb = -10sd
1000000	1000	0.05623	0.1	0.0001	0.0001	0.996033	2.2053e-05	54.1935	0.0244062	54.1661	54.2129	3	sb = -sd
1000000	1000	0.05623	0.1	0.0001	0.001	1.02046	0.00231665	59.2044	0.88634	58.1991	59.8733	3	sb = -10sd
1000000	1000	0.05623	0.1	0.001	0.001	0.995928	0.00604897	46.7754	0.345622	46.4135	47.102	3	sb = -sd
1000000	1000	0.05623	0.1	0.001	0.01	4.60547	0.0883839	86.8505	3.84241	83.7134	91.1362	3	sb = -10sd
1000000	1000	0.05623	0.1	0.01	0.01	4.04159	0.267489	65.71	1.57163	64.6416	67.5146	3	sb = -sd
1000000	1000	0.05623	0.1	0.01	0.1	4.5526e+26	5.12348e+26	211.959	6.23433	206.19	218.573	3	sb = -10sd	X
1000000	1000	0.1	0.01	1e-05	1e-05	0.999032	1e-06	99.4762	0.212154	99.2329	99.6222	3	sb = -sd
1000000	1000	0.1	0.01	1e-05	0.0001	0.999132	4.50925e-06	99.6732	0.136268	99.5375	99.8101	3	sb = -10sd
1000000	1000	0.1	0.01	0.0001	0.0001	0.991152	1.66533e-05	95.3251	0.174421	95.1751	95.5165	3	sb = -sd
1000000	1000	0.1	0.01	0.0001	0.001	0.996191	0.000639286	96.562	0.641054	95.8371	97.0541	3	sb = -10sd
1000000	1000	0.1	0.01	0.001	0.001	0.957418	0.00559859	73.9747	0.898534	73.3586	75.0057	3	sb = -sd
1000000	1000	0.1	0.01	0.001	0.01	2.17893	0.279157	109.531	7.49185	101.81	116.77	3	sb = -10sd
1000000	1000	0.1	0.01	0.01	0.01	1.5534	0.0229902	54.906	4.28883	52.0929	59.8423	3	sb = -sd
1000000	1000	0.1	0.01	0.01	0.1	8530088771331470	5365028397865050	167.378	8.34397	157.756	172.611	3	sb = -10sd
1000000	1000	0.1	0.1	1e-05	1e-05	0.999213	3.05505e-06	99.5333	0.082922	99.4643	99.6253	3	sb = -sd
1000000	1000	0.1	0.1	1e-05	0.0001	1.00023	7.0946e-06	100.223	0.275203	100.042	100.539	3	sb = -10sd
1000000	1000	0.1	0.1	0.0001	0.0001	0.992938	7.93725e-06	96.3786	0.189846	96.1615	96.5135	3	sb = -sd
1000000	1000	0.1	0.1	0.0001	0.001	1.02988	0.00225213	107.368	4.1342	104.833	112.139	3	sb = -10sd
1000000	1000	0.1	0.1	0.001	0.001	0.984429	0.00393365	81.3276	2.02584	79.6341	83.5719	3	sb = -sd
1000000	1000	0.1	0.1	0.001	0.01	6.43896	0.181852	134.041	7.34459	127.416	141.939	3	sb = -10sd
1000000	1000	0.1	0.1	0.01	0.01	4.58616	0.560112	91.9192	6.69914	84.6675	97.8771	3	sb = -sd
1000000	1000	0.1	0.1	0.01	0.1	2.24601e+31	2.31589e+31	274.197	17.4081	260.851	293.888	3	sb = -10sd	X
1000000	1000	0.17783	0.01	1e-05	1e-05	0.998276	1.1547e-06	176.811	0.0624487	176.758	176.88	3	sb = -sd	X
1000000	1000	0.17783	0.01	1e-05	0.0001	0.998462	1.01489e-05	176.798	0.221542	176.57	177.012	3	sb = -10sd	X
1000000	1000	0.17783	0.01	0.0001	0.0001	0.984346	3.60416e-05	169.708	0.377856	169.482	170.144	3	sb = -sd	X
1000000	1000	0.17783	0.01	0.0001	0.001	0.993905	0.00168893	169.738	2.88933	166.857	172.636	3	sb = -10sd	X
1000000	1000	0.17783	0.01	0.001	0.001	0.917859	0.00291598	131.521	3.01883	128.357	134.37	3	sb = -sd
1000000	1000	0.17783	0.01	0.001	0.01	2.33474	0.0448974	179.983	10.4109	167.962	186.119	3	sb = -10sd	X
1000000	1000	0.17783	0.01	0.01	0.01	1.63105	0.0421252	107.726	9.88112	98.1237	117.864	3	sb = -sd
1000000	1000	0.17783	0.01	0.01	0.1	1.21321e+19	1.09144e+19	246.515	27.9984	229.01	278.807	3	sb = -10sd	X
1000000	1000	0.17783	0.1	1e-05	1e-05	0.9986	2.64575e-06	176.928	0.236571	176.71	177.18	3	sb = -sd	X
1000000	1000	0.17783	0.1	1e-05	0.0001	1.00039	3.52751e-05	177.606	0.300968	177.304	177.906	3	sb = -10sd	X
1000000	1000	0.17783	0.1	0.0001	0.0001	0.98747	7.37857e-05	171.68	0.235062	171.426	171.889	3	sb = -sd	X
1000000	1000	0.17783	0.1	0.0001	0.001	1.04219	0.00199114	186.028	6.31776	178.932	191.041	3	sb = -10sd	X
1000000	1000	0.17783	0.1	0.001	0.001	0.958495	0.00549441	148.058	3.99369	143.476	150.803	3	sb = -sd
1000000	1000	0.17783	0.1	0.001	0.01	11.8333	0.865924	241.161	13.377	231.384	256.406	3	sb = -10sd	X
1000000	1000	0.17783	0.1	0.01	0.01	6.45937	0.58158	166.318	7.40359	158.796	173.598	3	sb = -sd
1000000	1000	0.17783	0.1	0.01	0.1	7.32275e+36	7.78877e+36	396.954	0.359406	396.6	397.319	3	sb = -10sd	X
1000000	1000	0.31623	0.01	1e-05	1e-05	0.996938	3.05505e-06	314.455	0.413997	313.977	314.708	3	sb = -sd	X
1000000	1000	0.31623	0.01	1e-05	0.0001	0.997256	2.64575e-06	315.071	0.292651	314.812	315.388	3	sb = -10sd	X
1000000	1000	0.31623	0.01	0.0001	0.0001	0.972283	8.80019e-05	302.025	0.336087	301.793	302.411	3	sb = -sd	X
1000000	1000	0.31623	0.01	0.0001	0.001	0.986431	0.00110374	306.696	2.7473	304.91	309.86	3	sb = -10sd	X
1000000	1000	0.31623	0.01	0.001	0.001	0.851718	0.0036631	234.996	12.5757	226.744	249.469	3	sb = -sd	X
1000000	1000	0.31623	0.01	0.001	0.01	2.65808	0.19357	318.817	20.1029	300.788	340.494	3	sb = -10sd	X
1000000	1000	0.31623	0.01	0.01	0.01	1.09786	0.0656361	177.867	10.6028	165.697	185.108	3	sb = -sd	X
1000000	1000	0.31623	0.01	0.01	0.1	3.44005e+21	2.77046e+21	401.135	13.7812	385.382	410.963	3	sb = -10sd	X
1000000	1000	0.31623	0.1	1e-05	1e-05	0.997508	3.05505e-06	314.721	0.152925	314.59	314.889	3	sb = -sd	X
1000000	1000	0.31623	0.1	1e-05	0.0001	1.00069	3.50428e-05	316.438	0.490296	316.13	317.004	3	sb = -10sd	X
1000000	1000	0.31623	0.1	0.0001	0.0001	0.97786	9.28134e-05	304.744	0.0676997	304.675	304.811	3	sb = -sd	X
1000000	1000	0.31623	0.1	0.0001	0.001	1.06008	0.00227156	325.222	5.15386	319.999	330.304	3	sb = -10sd	X
1000000	1000	0.31623	0.1	0.001	0.001	0.9213	0.00898982	271.674	9.35315	264.331	282.204	3	sb = -sd	X
1000000	1000	0.31623	0.1	0.001	0.01	19.6302	0.575601	382.423	15.9583	370.509	400.554	3	sb = -10sd	X
1000000	1000	0.31623	0.1	0.01	0.01	8.15913	0.166143	263.782	16.5324	246.778	279.798	3	sb = -sd	X
1000000	1000	0.31623	0.1	0.01	0.1	3.58227e+45	3.35816e+45	569.385	25.6497	547.082	597.414	3	sb = -10sd	X
1000000	1000	0.56234	0.01	1e-05	1e-05	0.994548	3e-06	560.213	0.372814	559.783	560.444	3	sb = -sd	X
1000000	1000	0.56234	0.01	1e-05	0.0001	0.995135	4.16333e-06	560.067	0.33974	559.732	560.411	3	sb = -10sd	X
1000000	1000	0.56234	0.01	0.0001	0.0001	0.951119	0.000120276	537.018	0.577391	536.371	537.481	3	sb = -sd	X
1000000	1000	0.56234	0.01	0.0001	0.001	0.970671	0.000111253	547.371	2.26505	544.764	548.857	3	sb = -10sd	X
1000000	1000	0.56234	0.01	0.001	0.001	0.730206	0.00703891	441.726	7.25205	436.502	450.005	3	sb = -sd	X
1000000	1000	0.56234	0.01	0.001	0.01	3.35609	0.594288	546.332	15.9242	531.008	562.796	3	sb = -10sd	X
1000000	1000	0.56234	0.01	0.01	0.01	0.570207	0.049284	308.217	12.0239	298.752	321.746	3	sb = -sd	X
1000000	1000	0.56234	0.01	0.01	0.1	3.46679e+24	4.56588e+24	645.373	9.49532	635.14	653.899	3	sb = -10sd	X
1000000	1000	0.56234	0.1	1e-05	1e-05	0.995565	1.67033e-05	560.357	0.481537	559.871	560.834	3	sb = -sd	X
1000000	1000	0.56234	0.1	1e-05	0.0001	1.00121	9.86577e-06	562.639	1.20004	561.447	563.847	3	sb = -10sd	X
1000000	1000	0.56234	0.1	0.0001	0.0001	0.961098	0.000141938	541.971	0.72259	541.26	542.705	3	sb = -sd	X
1000000	1000	0.56234	0.1	0.0001	0.001	1.09763	0.00866608	587.201	18.8238	575.006	608.88	3	sb = -10sd	X
1000000	1000	0.56234	0.1	0.001	0.001	0.816295	0.00787725	476.715	17.1627	459.589	493.915	3	sb = -sd	X
1000000	1000	0.56234	0.1	0.001	0.01	60.5269	7.3918	655.637	28.5235	622.908	675.193	3	sb = -10sd
1000000	1000	0.56234	0.1	0.01	0.01	8.35498	0.789409	434.408	5.37196	428.431	438.833	3	sb = -sd	X
1000000	1000	0.56234	0.1	0.01	0.1	5.06679e+55	6.48128e+55	899.467	14.0896	885.725	913.88	3	sb = -10sd
1000000	1000	1	0.01	1e-05	1e-05	0.990334	2.08167e-06	995.39	0.534879	995.069	996.008	3	sb = -sd
1000000	1000	1	0.01	1e-05	0.0001	0.991354	1.62891e-05	995.111	0.227361	994.882	995.337	3	sb = -10sd
1000000	1000	1	0.01	0.0001	0.0001	0.915052	0.00032982	953.393	1.24666	952.382	954.786	3	sb = -sd
1000000	1000	1	0.01	0.0001	0.001	0.951495	0.0120077	969.317	13.8083	953.898	980.541	3	sb = -10sd
1000000	1000	1	0.01	0.001	0.001	0.540672	0.00161382	801.934	9.26019	792.936	811.435	3	sb = -sd
1000000	1000	1	0.01	0.001	0.01	2.92555	0.434188	924.433	9.52345	913.749	932.031	3	sb = -10sd
1000000	1000	1	0.01	0.01	0.01	0.130339	0.00516621	562.968	12.2206	549.199	572.525	3	sb = -sd	X
1000000	1000	1	0.01	0.01	0.1	1.68069e+28	1.44861e+28	1030.5	44.9141	978.641	1057.09	3	sb = -10sd
1000000	1000	1	0.1	1e-05	1e-05	0.992136	1.32035e-05	996.693	0.50668	996.158	997.165	3	sb = -sd
1000000	1000	1	0.1	1e-05	0.0001	1.00223	2.47588e-05	1001.18	1.51177	1000.02	1002.89	3	sb = -10sd
1000000	1000	1	0.1	0.0001	0.0001	0.931796	0.000303079	962.366	0.0946116	962.31	962.475	3	sb = -sd
1000000	1000	1	0.1	0.0001	0.001	1.14149	0.00205362	1027.94	7.25217	1021.38	1035.73	3	sb = -10sd
1000000	1000	1	0.1	0.001	0.001	0.672283	0.00415494	877.816	9.38718	872.219	888.654	3	sb = -sd
1000000	1000	1	0.1	0.001	0.01	172.475	29.827	1125.57	17.9444	1111.4	1145.75	3	sb = -10sd
1000000	1000	1	0.1	0.01	0.01	4.41881	1.12375	769.024	19.0243	754.159	790.464	3	sb = -sd
1000000	1000	1	0.1	0.01	0.1	1.26674e+70	2.02164e+70	1416.85	24.2772	1393.48	1441.94	3	sb = -10sd
1000000	2000	0.001	0.01	1e-05	1e-05	0.999981	5.7735e-07	1.9604	0.0564238	1.91751	2.02432	3	sb = -sd
1000000	2000	0.001	0.01	1e-05	0.0001	0.999983	1.1547e-06	1.97418	0.00443389	1.96918	1.97765	3	sb = -10sd
1000000	2000	0.001	0.01	0.0001	0.0001	0.999841	7.2111e-06	1.82142	0.0212255	1.79692	1.83391	3	sb = -sd
1000000	2000	0.001	0.01	0.0001	0.001	1.00163	0.00105554	2.55016	0.555418	2.06628	3.15663	3	sb = -10sd
1000000	2000	0.001	0.01	0.001	0.001	1.00321	0.00459374	2.10154	1.19315	1.36813	3.47829	3	sb = -sd
1000000	2000	0.001	0.01	0.001	0.01	1.54666	0.0455579	9.42892	0.979678	8.29772	10.003	3	sb = -10sd
1000000	2000	0.001	0.01	0.01	0.01	1.53752	0.134886	8.62425	1.90171	7.15874	10.7732	3	sb = -sd
1000000	2000	0.001	0.01	0.01	0.1	1.0367e+10	1.26232e+10	55.9631	0.0889847	55.9036	56.0654	3	sb = -10sd
1000000	2000	0.001	0.1	1e-05	1e-05	0.999984	5.7735e-07	1.97407	0.0252928	1.94579	1.99453	3	sb = -sd
1000000	2000	0.001	0.1	1e-05	0.0001	1.00001	2.51661e-06	2.00135	0.00280618	1.99812	2.00315	3	sb = -10sd
1000000	2000	0.001	0.1	0.0001	0.0001	0.999872	7.63763e-06	1.87605	0.0652905	1.81042	1.941	3	sb = -sd
1000000	2000	0.001	0.1	0.0001	0.001	1.00816	0.000297622	3.45726	0.406217	3.00082	3.77908	3	sb = -10sd
1000000	2000	0.001	0.1	0.001	0.001	1.00752	0.00339144	3.26702	0.697216	2.56246	3.95665	3	sb = -sd
1000000	2000	0.001	0.1	0.001	0.01	2.31068	0.281441	15.899	1.80105	14.203	17.7893	3	sb = -10sd
1000000	2000	0.001	0.1	0.01	0.01	2.43314	0.0536122	14.8422	0.783249	14.3215	15.743	3	sb = -sd
1000000	2000	0.001	0.1	0.01	0.1	2.55133e+18	2.50474e+18	97.7356	6.11568	90.7793	102.267	3	sb = -10sd
1000000	2000	0.00178	0.01	1e-05	1e-05	0.999965	1.52753e-06	3.53631	0.101854	3.46957	3.65355	3	sb = -sd
1000000	2000	0.00178	0.01	1e-05	0.0001	0.999969	1.73205e-06	3.54585	0.0345593	3.51189	3.58098	3	sb = -10sd
1000000	2000	0.00178	0.01	0.0001	0.0001	0.999708	1.13578e-05	3.28745	0.0564617	3.22881	3.34145	3	sb = -sd
1000000	2000	0.00178	0.01	0.0001	0.001	1.00492	0.0031645	3.49836	0.261888	3.27542	3.78677	3	sb = -10sd
1000000	2000	0.00178	0.01	0.001	0.001	1.0032	0.00322737	2.65583	0.592443	2.19409	3.32384	3	sb = -sd
1000000	2000	0.00178	0.01	0.001	0.01	1.65444	0.0357571	11.9971	1.08858	10.7409	12.6628	3	sb = -10sd
1000000	2000	0.00178	0.01	0.01	0.01	1.70509	0.126506	10.0496	1.04881	9.15974	11.2059	3	sb = -sd
1000000	2000	0.00178	0.01	0.01	0.1	1.31813e+12	1.04311e+12	66.5291	3.42032	63.3715	70.1623	3	sb = -10sd
1000000	2000	0.00178	0.1	1e-05	1e-05	0.999971	1.52753e-06	3.55191	0.105131	3.43847	3.64606	3	sb = -sd
1000000	2000	0.00178	0.1	1e-05	0.0001	1.00001	2.51661e-06	3.6368	0.0399974	3.59665	3.67664	3	sb = -10sd
1000000	2000	0.00178	0.1	0.0001	0.0001	0.999774	6.1101e-06	3.32965	0.0868355	3.23007	3.38961	3	sb = -sd
1000000	2000	0.00178	0.1	0.0001	0.001	1.00969	0.0030639	5.47558	0.903239	4.46904	6.21548	3	sb = -10sd
1000000	2000	0.00178	0.1	0.001	0.001	1.00833	0.000924766	3.83233	0.234757	3.63206	4.09067	3	sb = -sd
1000000	2000	0.00178	0.1	0.001	0.01	2.66492	0.0719874	19.3305	2.30402	17.5381	21.9293	3	sb = -10sd
1000000	2000	0.00178	0.1	0.01	0.01	2.74876	0.288188	19.1174	1.16931	17.8188	20.0868	3	sb = -sd
1000000	2000	0.00178	0.1	0.01	0.1	1.96678e+21	1.34847e+21	110.988	1.95562	109.305	113.134	3	sb = -10sd
1000000	2000	0.00316	0.01	1e-05	1e-05	0.999939	1.73205e-06	6.27223	0.18077	6.07575	6.43149	3	sb = -sd
1000000	2000	0.00316	0.01	1e-05	0.0001	0.999948	1.52753e-06	6.34373	0.0643571	6.29025	6.41516	3	sb = -10sd
1000000	2000	0.00316	0.01	0.0001	0.0001	0.999493	1.38564e-05	5.78387	0.0466012	5.73006	5.81122	3	sb = -sd
1000000	2000	0.00316	0.01	0.0001	0.001	1.00482	0.00117886	7.13444	0.269314	6.88692	7.42123	3	sb = -10sd
1000000	2000	0.00316	0.01	0.001	0.001	1.00119	0.00290378	4.53159	0.534495	3.97482	5.0406	3	sb = -sd
1000000	2000	0.00316	0.01	0.001	0.01	1.9071	0.203472	18.1474	4.48916	15.4777	23.3302	3	sb = -10sd
1000000	2000	0.00316	0.01	0.01	0.01	1.91208	0.0982719	13.7743	2.91621	12.0664	17.1415	3	sb = -sd
1000000	2000	0.00316	0.01	0.01	0.1	5.44014e+12	2.4243e+11	72.3451	2.26344	70.0542	74.5801	3	sb = -10sd
1000000	2000	0.00316	0.1	1e-05	1e-05	0.99995	5.7735e-07	6.28745	0.0496524	6.2407	6.33957	3	sb = -sd
1000000	2000	0.00316	0.1	1e-05	0.0001	1.00002	3e-06	6.3815	0.0472186	6.32944	6.42156	3	sb = -10sd
1000000	2000	0.00316	0.1	0.0001	0.0001	0.999593	7.02377e-06	5.95879	0.0662286	5.91049	6.03428	3	sb = -sd
1000000	2000	0.00316	0.1	0.0001	0.001	1.01152	0.00269255	8.72988	0.726178	7.94467	9.37728	3	sb = -10sd
1000000	2000	0.00316	0.1	0.001	0.001	1.01144	0.00302753	7.07781	1.41844	5.83321	8.62218	3	sb = -sd
1000000	2000	0.00316	0.1	0.001	0.01	3.18386	0.266752	25.8781	3.30167	22.1535	28.4448	3	sb = -10sd
1000000	2000	0.00316	0.1	0.01	0.01	3.26551	0.0826441	22.0669	2.28199	19.4319	23.3961	3	sb = -sd
1000000	2000	0.00316	0.1	0.01	0.1	1.20916e+24	4.44767e+23	128.404	1.10391	127.131	129.106	3	sb = -10sd
1000000	2000	0.00562	0.01	1e-05	1e-05	0.999891	5.7735e-07	11.1203	0.0380559	11.0764	11.1436	3	sb = -sd
1000000	2000	0.00562	0.01	1e-05	0.0001	0.999901	2.64575e-06	11.2198	0.108122	11.1016	11.3138	3	sb = -10sd
1000000	2000	0.00562	0.01	0.0001	0.0001	0.999095	1.15902e-05	10.2411	0.109065	10.1155	10.3112	3	sb = -sd
1000000	2000	0.00562	0.01	0.0001	0.001	1.00497	0.00232068	10.971	1.45957	9.30076	12.0013	3	sb = -10sd
1000000	2000	0.00562	0.01	0.001	0.001	1.00278	0.0020142	8.25642	0.431498	7.83772	8.69967	3	sb = -sd
1000000	2000	0.00562	0.01	0.001	0.01	2.11681	0.180287	20.785	3.76353	17.0687	24.594	3	sb = -10sd
1000000	2000	0.00562	0.01	0.01	0.01	2.14585	0.11647	17.0335	1.86409	14.9109	18.4042	3	sb = -sd
1000000	2000	0.00562	0.01	0.01	0.1	1.08364e+16	1.57617e+16	91.335	4.5895	87.1704	96.2555	3	sb = -10sd
1000000	2000	0.00562	0.1	1e-05	1e-05	0.999911	2e-06	11.221	0.226966	11.0441	11.4769	3	sb = -sd
1000000	2000	0.00562	0.1	1e-05	0.0001	1.00004	6.4291e-06	11.2714	0.0680947	11.1929	11.3146	3	sb = -10sd
1000000	2000	0.00562	0.1	0.0001	0.0001	0.999291	1.63707e-05	10.5599	0.0948834	10.4766	10.6632	3	sb = -sd
1000000	2000	0.00562	0.1	0.0001	0.001	1.01847	0.00297988	12.8755	0.473135	12.4171	13.3621	3	sb = -10sd
1000000	2000	0.00562	0.1	0.001	0.001	1.01327	0.00299457	10.9173	0.98843	10.23	12.0501	3	sb = -sd
1000000	2000	0.00562	0.1	0.001	0.01	4.31938	0.231272	39.6789	3.42215	36.2805	43.1243	3	sb = -10sd
1000000	2000	0.00562	0.1	0.01	0.01	4.63042	0.358935	33.3103	4.14468	28.7119	36.7581	3	sb = -sd
1000000	2000	0.00562	0.1	0.01	0.1	1.13663e+28	1.20513e+28	154.124	3.62191	150.067	157.031	3	sb = -10sd
1000000	2000	0.01	0.01	1e-05	1e-05	0.999807	2.08167e-06	19.9606	0.103544	19.8671	20.0719	3	sb = -sd
1000000	2000	0.01	0.01	1e-05	0.0001	0.999835	4.50925e-06	19.8828	0.024858	19.8543	19.8999	3	sb = -10sd
1000000	2000	0.01	0.01	0.0001	0.0001	0.998389	1.35769e-05	18.2553	0.157064	18.0747	18.3605	3	sb = -sd
1000000	2000	0.01	0.01	0.0001	0.001	1.00498	0.00202954	20.918	1.0802	19.7548	21.8895	3	sb = -10sd
1000000	2000	0.01	0.01	0.001	0.001	0.998593	0.00214313	13.0633	0.887447	12.4738	14.084	3	sb = -sd
1000000	2000	0.01	0.01	0.001	0.01	2.30088	0.0862271	34.5913	1.80702	32.5298	35.9015	3	sb = -10sd
1000000	2000	0.01	0.01	0.01	0.01	2.40426	0.257316	22.8565	2.63833	20.09	25.3446	3	sb = -sd
1000000	2000	0.01	0.01	0.01	0.1	9.95452e+18	6.53018e+18	114.275	3.61277	111.241	118.272	3	sb = -10sd
1000000	2000	0.01	0.1	1e-05	1e-05	0.999842	5.7735e-07	19.8573	0.108539	19.74	19.9543	3	sb = -sd
1000000	2000	0.01	0.1	1e-05	0.0001	1.00007	1.17898e-05	20.0536	0.121922	19.9397	20.1822	3	sb = -10sd
1000000	2000	0.01	0.1	0.0001	0.0001	0.99876	1.83303e-05	18.576	0.0102302	18.5681	18.5875	3	sb = -sd
1000000	2000	0.01	0.1	0.0001	0.001	1.02545	0.00431249	23.3307	1.41141	21.9834	24.7985	3	sb = -10sd
1000000	2000	0.01	0.1	0.001	0.001	1.01642	0.00401838	19.5854	2.70114	17.0903	22.4538	3	sb = -sd
1000000	2000	0.01	0.1	0.001	0.01	6.27011	0.378966	50.4637	4.59307	45.1606	53.1817	3	sb = -10sd
1000000	2000	0.01	0.1	0.01	0.01	5.19187	0.14257	41.8899	2.98571	38.5097	44.1676	3	sb = -sd
1000000	2000	0.01	0.1	0.01	0.1	2.44646e+32	1.74988e+32	186.866	8.98185	177.333	195.17	3	sb = -10sd	X
1000000	2000	0.01778	0.01	1e-05	1e-05	0.999657	3.60555e-06	35.1781	0.151814	35.0153	35.3157	3	sb = -sd
1000000	2000	0.01778	0.01	1e-05	0.0001	0.999699	3.05505e-06	35.1602	0.148227	35.0132	35.3096	3	sb = -10sd
1000000	2000	0.01778	0.01	0.0001	0.0001	0.997122	1.40475e-05	32.4841	0.227745	32.2276	32.6624	3	sb = -sd
1000000	2000	0.01778	0.01	0.0001	0.001	1.00528	0.00118073	34.2237	1.53124	33.2321	35.9873	3	sb = -10sd
1000000	2000	0.01778	0.01	0.001	0.001	0.995228	0.00105686	22.5325	1.49272	20.9367	23.8946	3	sb = -sd
1000000	2000	0.01778	0.01	0.001	0.01	2.51791	0.116048	51.7769	7.20714	43.8182	57.8626	3	sb = -10sd
1000000	2000	0.01778	0.01	0.01	0.01	2.64438	0.530404	31.404	3.94422	28.0965	35.7692	3	sb = -sd
1000000	2000	0.01778	0.01	0.01	0.1	1.24963e+21	1.6955e+21	131.733	0.856981	130.873	132.587	3	sb = -10sd
1000000	2000	0.01778	0.1	1e-05	1e-05	0.999723	3.05505e-06	35.2334	0.0543103	35.1816	35.2899	3	sb = -sd
1000000	2000	0.01778	0.1	1e-05	0.0001	1.00014	6e-06	35.6843	0.123068	35.5839	35.8216	3	sb = -10sd
1000000	2000	0.01778	0.1	0.0001	0.0001	0.997784	2.3e-05	33.1326	0.147739	32.9635	33.2365	3	sb = -sd
1000000	2000	0.01778	0.1	0.0001	0.001	1.02852	0.00176086	40.2816	3.3801	36.4177	42.6904	3	sb = -10sd
1000000	2000	0.01778	0.1	0.001	0.001	1.0183	0.00307258	29.5685	1.93008	27.621	31.4806	3	sb = -sd
1000000	2000	0.01778	0.1	0.001	0.01	7.57892	0.571756	68.7801	5.28366	63.7575	74.291	3	sb = -10sd
1000000	2000	0.01778	0.1	0.01	0.01	8.4516	0.380429	68.1619	4.61633	65.1101	73.4727	3	sb = -sd
1000000	2000	0.01778	0.1	0.01	0.1	6.82721e+38	5.40418e+38	243.012	14.4762	226.301	251.679	3	sb = -10sd	X
1000000	2000	0.03162	0.01	1e-05	1e-05	0.999396	4.3589e-06	62.4766	0.262894	62.2629	62.7702	3	sb = -sd
1000000	2000	0.03162	0.01	1e-05	0.0001	0.99946	7.02377e-06	62.9675	0.27209	62.7662	63.2771	3	sb = -10sd
1000000	2000	0.03162	0.01	0.0001	0.0001	0.994896	1.5308e-05	57.8124	0.074119	57.7551	57.8961	3	sb = -sd
1000000	2000	0.03162	0.01	0.0001	0.001	1.00837	0.00338695	61.129	1.50959	59.6278	62.6468	3	sb = -10sd
1000000	2000	0.03162	0.01	0.001	0.001	0.988484	0.0062761	40.2388	0.726058	39.4143	40.7826	3	sb = -sd
1000000	2000	0.03162	0.01	0.001	0.01	3.02508	0.196878	80.7578	13.2144	67.5221	93.9507	3	sb = -10sd
1000000	2000	0.03162	0.01	0.01	0.01	2.8936	0.33732	46.3494	0.44535	45.8378	46.6502	3	sb = -sd
1000000	2000	0.03162	0.01	0.01	0.1	1.05487e+24	3.90981e+23	175.224	6.72893	168.188	181.596	3	sb = -10sd	X
1000000	2000	0.03162	0.1	1e-05	1e-05	0.999507	4e-06	62.7504	0.157492	62.576	62.8823	3	sb = -sd
1000000	2000	0.03162	0.1	1e-05	0.0001	1.00022	1.15902e-05	63.2696	0.209304	63.0282	63.4	3	sb = -10sd
1000000	2000	0.03162	0.1	0.0001	0.0001	0.996074	3.36452e-05	58.9229	0.0450643	58.8738	58.9624	3	sb = -sd
1000000	2000	0.03162	0.1	0.0001	0.001	1.04126	0.00432367	70.7549	2.30415	68.0961	72.1704	3	sb = -10sd
1000000	2000	0.03162	0.1	0.001	0.001	1.01835	0.00410497	54.3009	4.06411	50.6869	58.7004	3	sb = -sd
1000000	2000	0.03162	0.1	0.001	0.01	12.9939	1.23808	113.791	3.74798	109.871	117.339	3	sb = -10sd
1000000	2000	0.03162	0.1	0.01	0.01	11.3995	0.778891	88.1294	6.96942	80.6077	94.3683	3	sb = -sd
1000000	2000	0.03162	0.1	0.01	0.1	2.29271e+44	1.76547e+44	296.892	14.8155	280.064	307.973	3	sb = -10sd	X
1000000	2000	0.05623	0.01	1e-05	1e-05	0.99892	5.56776e-06	111.222	0.173542	111.08	111.416	3	sb = -sd
1000000	2000	0.05623	0.01	1e-05	0.0001	0.999054	9e-06	111.636	0.611357	111.19	112.333	3	sb = -10sd
1000000	2000	0.05623	0.01	0.0001	0.0001	0.990892	4.89524e-05	102.987	0.608786	102.313	103.497	3	sb = -sd
1000000	2000	0.05623	0.01	0.0001	0.001	1.0085	0.00322247	114.278	1.65386	112.873	116.101	3	sb = -10sd
1000000	2000	0.05623	0.01	0.001	0.001	0.971626	0.00233517	68.5579	6.87617	60.6276	72.862	3	sb = -sd
1000000	2000	0.05623	0.01	0.001	0.01	4.07117	0.239933	120.716	5.083	116.228	126.236	3	sb = -10sd
1000000	2000	0.05623	0.01	0.01	0.01	2.82697	0.199085	72.2593	6.20126	66.9733	79.0855	3	sb = -sd
1000000	2000	0.05623	0.01	0.01	0.1	1.70607e+28	1.43303e+28	236.264	6.25745	229.375	241.596	3	sb = -10sd	X
1000000	2000	0.05623	0.1	1e-05	1e-05	0.999121	7e-06	111.592	0.432563	111.323	112.091	3	sb = -sd
1000000	2000	0.05623	0.1	1e-05	0.0001	1.00041	1.5885e-05	112.715	0.0772164	112.627	112.773	3	sb = -10sd
1000000	2000	0.05623	0.1	0.0001	0.0001	0.992993	3.55293e-05	104.361	0.442093	104.1	104.872	3	sb = -sd
1000000	2000	0.05623	0.1	0.0001	0.001	1.05722	0.00322165	120.719	10.6661	108.487	128.079	3	sb = -10sd
1000000	2000	0.05623	0.1	0.001	0.001	1.02133	0.00894131	93.7791	2.87226	91.8065	97.0744	3	sb = -sd
1000000	2000	0.05623	0.1	0.001	0.01	23.0383	1.79395	180.396	11.0607	167.668	187.675	3	sb = -10sd	X
1000000	2000	0.05623	0.1	0.01	0.01	17.7554	1.15397	139.453	10.2672	129.208	149.743	3	sb = -sd
1000000	2000	0.05623	0.1	0.01	0.1	6.35875e+53	9.60123e+53	420.468	7.88201	412.428	428.182	3	sb = -10sd	X
1000000	2000	0.1	0.01	1e-05	1e-05	0.998085	1e-06	198.017	0.201627	197.884	198.249	3	sb = -sd	X
1000000	2000	0.1	0.01	1e-05	0.0001	0.998309	1.26623e-05	198.511	0.529389	197.967	199.024	3	sb = -10sd	X
1000000	2000	0.1	0.01	0.0001	0.0001	0.983918	9.33595e-05	182.261	0.77422	181.651	183.132	3	sb = -sd	X
1000000	2000	0.1	0.01	0.0001	0.001	1.00693	0.0049661	192.708	2.45424	190.242	195.15	3	sb = -10sd	X
1000000	2000	0.1	0.01	0.001	0.001	0.932871	0.00580336	133.209	2.10715	131.31	135.476	3	sb = -sd
1000000	2000	0.1	0.01	0.001	0.01	5.08314	0.388921	217.816	9.04105	211.733	228.205	3	sb = -10sd	X
1000000	2000	0.1	0.01	0.01	0.01	2.89278	0.185912	114.79	14.0962	99.9083	127.941	3	sb = -sd
1000000	2000	0.1	0.01	0.01	0.1	2.04814e+32	2.25955e+32	346.889	7.81294	338.283	353.537	3	sb = -10sd	X
1000000	2000	0.1	0.1	1e-05	1e-05	0.998448	2.64575e-06	198.058	0.342379	197.676	198.338	3	sb = -sd	X
1000000	2000	0.1	0.1	1e-05	0.0001	1.00073	1.50444e-05	200.9	0.489924	200.349	201.286	3	sb = -10sd	X
1000000	2000	0.1	0.1	0.0001	0.0001	0.987539	5.3563e-05	186.55	0.813867	185.61	187.026	3	sb = -sd	X
1000000	2000	0.1	0.1	0.0001	0.001	1.08687	0.00556255	212.503	17.2755	201.723	232.428	3	sb = -10sd	X
1000000	2000	0.1	0.1	0.001	0.001	0.993844	0.00451649	159.954	5.07027	156.882	165.806	3	sb = -sd
1000000	2000	0.1	0.1	0.001	0.01	50.5955	8.20674	283.742	6.00972	276.988	288.5	3	sb = -10sd	X
1000000	2000	0.1	0.1	0.01	0.01	26.0316	4.45882	190.007	12.5681	175.816	199.731	3	sb = -sd	X
1000000	2000	0.1	0.1	0.01	0.1	5.28477e+62	6.3344e+62	552.933	19.8874	538.504	575.619	3	sb = -10sd	X
1000000	2000	0.17783	0.01	1e-05	1e-05	0.996592	3.60555e-06	352.188	0.424496	351.822	352.653	3	sb = -sd	X
1000000	2000	0.17783	0.01	1e-05	0.0001	0.996992	1.31149e-05	352.323	0.0865691	352.229	352.399	3	sb = -10sd	X
1000000	2000	0.17783	0.01	0.0001	0.0001	0.97166	0.000450294	325.469	2.25574	323.325	327.822	3	sb = -sd	X
1000000	2000	0.17783	0.01	0.0001	0.001	1.00096	0.00245403	330.599	5.17825	327.416	336.574	3	sb = -10sd	X
1000000	2000	0.17783	0.01	0.001	0.001	0.871556	0.00709267	247.515	7.79645	239.755	255.347	3	sb = -sd	X
1000000	2000	0.17783	0.01	0.001	0.01	6.12557	0.292418	361.972	32.5555	336.242	398.572	3	sb = -10sd	X
1000000	2000	0.17783	0.01	0.01	0.01	2.79137	0.0484306	203.599	7.01514	198.87	211.659	3	sb = -sd	X
1000000	2000	0.17783	0.01	0.01	0.1	1.93494e+38	2.48506e+38	496.973	30.4284	474.762	531.656	3	sb = -10sd	X
1000000	2000	0.17783	0.1	1e-05	1e-05	0.997233	6.50641e-06	352.388	0.474013	351.847	352.733	3	sb = -sd	X
1000000	2000	0.17783	0.1	1e-05	0.0001	1.00134	8.05874e-05	355.964	0.0609568	355.9	356.021	3	sb = -10sd	X
1000000	2000	0.17783	0.1	0.0001	0.0001	0.978561	0.000885579	327.277	5.03107	321.492	330.631	3	sb = -sd	X
1000000	2000	0.17783	0.1	0.0001	0.001	1.11074	0.00652668	369.825	20.9087	348.736	390.548	3	sb = -10sd	X
1000000	2000	0.17783	0.1	0.001	0.001	0.952947	0.00808406	293.5	6.384	286.933	299.684	3	sb = -sd	X
1000000	2000	0.17783	0.1	0.001	0.01	146.582	24.7112	459.606	26.7997	430.61	483.466	3	sb = -10sd	X
1000000	2000	0.17783	0.1	0.01	0.01	46.6743	6.58427	329.735	21.9802	305.822	349.058	3	sb = -sd	X
1000000	2000	0.17783	0.1	0.01	0.1	6.61381e+74	7.70937e+74	795.472	16.4248	777.693	810.08	3	sb = -10sd
1000000	2000	0.31623	0.01	1e-05	1e-05	0.993946	8.32666e-06	625.204	0.082445	625.109	625.259	3	sb = -sd	X
1000000	2000	0.31623	0.01	1e-05	0.0001	0.994665	1.20554e-05	626.857	0.211285	626.726	627.1	3	sb = -10sd	X
1000000	2000	0.31623	0.01	0.0001	0.0001	0.950031	0.000926845	576.766	6.33038	570.708	583.338	3	sb = -sd	X
1000000	2000	0.31623	0.01	0.0001	0.001	0.986834	0.00455293	602.095	14.958	586.879	616.781	3	sb = -10sd	X
1000000	2000	0.31623	0.01	0.001	0.001	0.754253	0.0109931	447.54	28.9236	417.861	475.644	3	sb = -sd	X
1000000	2000	0.31623	0.01	0.001	0.01	7.22191	0.253411	626.306	21.6537	607.839	650.138	3	sb = -10sd	X
1000000	2000	0.31623	0.01	0.01	0.01	1.57051	0.201937	355.849	16.9748	336.31	366.965	3	sb = -sd	X
1000000	2000	0.31623	0.01	0.01	0.1	4.71707e+42	1.17955e+42	786.292	14.1401	770.763	798.424	3	sb = -10sd
1000000	2000	0.31623	0.1	1e-05	1e-05	0.995097	1.65025e-05	627.28	1.07051	626.298	628.421	3	sb = -sd	X
1000000	2000	0.31623	0.1	1e-05	0.0001	1.00243	0.000234085	634.552	0.385298	634.114	634.837	3	sb = -10sd	X
1000000	2000	0.31623	0.1	0.0001	0.0001	0.960988	0.000842442	592.061	1.7881	590.689	594.083	3	sb = -sd	X
1000000	2000	0.31623	0.1	0.0001	0.001	1.15079	0.00763137	665.668	8.97822	655.509	672.538	3	sb = -10sd
1000000	2000	0.31623	0.1	0.001	0.001	0.878279	0.0168133	520.178	24.2547	496.017	544.525	3	sb = -sd	X
1000000	2000	0.31623	0.1	0.001	0.01	458.447	28.2937	765.197	10.9267	753.852	775.651	3	sb = -10sd
1000000	2000	0.31623	0.1	0.01	0.01	70.9057	14.3162	527.543	16.8022	508.606	540.665	3	sb = -sd	X
1000000	2000	0.31623	0.1	0.01	0.1	5.38451e+91	4.60634e+91	1156.15	37.6026	1116.12	1190.73	3	sb = -10sd
1000000	2000	0.56234	0.01	1e-05	1e-05	0.989238	1.72434e-05	1114.09	1.34147	1112.86	1115.52	3	sb = -sd
1000000	2000	0.56234	0.01	1e-05	0.0001	0.990583	5.50757e-06	1114.51	1.38269	1113.63	1116.1	3	sb = -10sd
1000000	2000	0.56234	0.01	0.0001	0.0001	0.912287	0.00119688	1029.51	10.1827	1019.55	1039.9	3	sb = -sd
1000000	2000	0.56234	0.01	0.0001	0.001	0.960085	0.000385226	1089.42	17.3057	1069.6	1101.56	3	sb = -10sd
1000000	2000	0.56234	0.01	0.001	0.001	0.560494	0.00377287	838.378	16.322	822.039	854.683	3	sb = -sd
1000000	2000	0.56234	0.01	0.001	0.01	11.6386	0.989064	1124.9	14.7142	1115.82	1141.88	3	sb = -10sd
1000000	2000	0.56234	0.01	0.01	0.01	0.403311	0.0360191	627.196	1.27732	625.826	628.354	3	sb = -sd	X
1000000	2000	0.56234	0.01	0.01	0.1	4.01132e+50	6.90237e+50	1262.39	23.7682	1235.79	1281.54	3	sb = -10sd
1000000	2000	0.56234	0.1	1e-05	1e-05	0.991263	1.04083e-05	1116.88	0.717796	1116.25	1117.66	3	sb = -sd
1000000	2000	0.56234	0.1	1e-05	0.0001	1.00403	8.85513e-05	1128.36	2.16589	1126.45	1130.71	3	sb = -10sd
1000000	2000	0.56234	0.1	0.0001	0.0001	0.931491	0.00134196	1052.56	12.8529	1039	1064.57	3	sb = -sd
1000000	2000	0.56234	0.1	0.0001	0.001	1.24033	0.00453597	1161.75	13.1495	1146.57	1169.63	3	sb = -10sd
1000000	2000	0.56234	0.1	0.001	0.001	0.705773	0.00840646	910.447	12.56	901.555	924.816	3	sb = -sd
1000000	2000	0.56234	0.1	0.001	0.01	3397.09	779.844	1301.87	42.032	1253.38	1327.78	3	sb = -10sd
1000000	2000	0.56234	0.1	0.01	0.01	76.472	8.29189	882.698	27.1213	852.196	904.096	3	sb = -sd
1000000	2000	0.56234	0.1	0.01	0.1	1.13618e+112	1.61136e+112	1804.47	18.475	1784.2	1820.36	3	sb = -10sd
1000000	2000	1	0.01	1e-05	1e-05	0.980963	2.09523e-05	1981.29	2.41183	1978.66	1983.4	3	sb = -sd
1000000	2000	1	0.01	1e-05	0.0001	0.983246	3.78021e-05	1981.55	0.969789	1980.64	1982.57	3	sb = -10sd
1000000	2000	1	0.01	0.0001	0.0001	0.847245	0.00140241	1849.31	11.1446	1837.85	1860.11	3	sb = -sd
1000000	2000	1	0.01	0.0001	0.001	0.913129	0.0113175	1931.17	29.1603	1905.86	1963.06	3	sb = -10sd
1000000	2000	1	0.01	0.001	0.001	0.311625	0.000997758	1569.32	21.4739	1549.76	1592.3	3	sb = -sd
1000000	2000	1	0.01	0.001	0.01	9.71166	1.31657	1872.19	34.1075	1835.3	1902.57	3	sb = -10sd
1000000	2000	1	0.01	0.01	0.01	0.0205847	0.00121507	1102.82	16.756	1086.97	1120.35	3	sb = -sd
1000000	2000	1	0.01	0.01	0.1	9.04966e+56	1.45415e+57	2082.64	43.3004	2033.59	2115.54	3	sb = -10sd
1000000	2000	1	0.1	1e-05	1e-05	0.984536	3.05341e-05	1984.47	1.92847	1982.95	1986.64	3	sb = -sd
1000000	2000	1	0.1	1e-05	0.0001	1.00732	0.000499964	2005.5	6.69315	1997.81	2010.03	3	sb = -10sd
1000000	2000	1	0.1	0.0001	0.0001	0.877296	0.000589789	1871.71	5.13489	1866.36	1876.6	3	sb = -sd
1000000	2000	1	0.1	0.0001	0.001	1.34978	0.0145729	2073.53	17.143	2055.35	2089.41	3	sb = -10sd
1000000	2000	1	0.1	0.001	0.001	0.472967	0.00203256	1709.68	21.6691	1684.66	1722.48	3	sb = -sd
1000000	2000	1	0.1	0.001	0.01	36103	8763.57	2230.41	17.5855	2217.52	2250.44	3	sb = -10sd
1000000	2000	1	0.1	0.01	0.01	25.9749	7.43979	1543.07	10.6901	1532.55	1553.93	3	sb = -sd
1000000	2000	1	0.1	0.01	0.1	8.94067e+140	1.4429e+141	2836.84	46.973	2786.62	2879.7	3	sb = -10sd
